# Supplementary material for: Pd/C-Catalyzed transfer hydrogenation of N–H indoles with trifluoroethanol and tetrahydroxydiboron as the hydrogen source
Source: Royal Society of Chemistry journal article supplement (doi:10.1039/d0ob02080j), 2020-12-10

## Supporting Information

# Pd/C-catalyzed Transfer Hydrogenation of *N*-H Indoles with Trifluoroethanol and Tetrahydroxydiboron as Hydrogen Source

Xiao-Yu Zhou and Xia Chen\*

School of Chemistry and Materials Engineering, Liupanshui Normal University, Liupanshui, 553004, China

xia811@live.cn (X. Chen)

### Table of Contents

|                                                                                           |              |
|-------------------------------------------------------------------------------------------|--------------|
| <b>1. General and Materials.....</b>                                                      | <b>S1</b>    |
| <b>2. The Typical Procedure for Pd/C-catalyzed Transfer Hydrogenation of Indoles.....</b> | <b>S2-4</b>  |
| <b>3. Mechanism Study.....</b>                                                            | <b>S4-7</b>  |
| <b>4. References.....</b>                                                                 | <b>S8</b>    |
| <b>5. Copy of NMR for the Indolines.....</b>                                              | <b>S9-30</b> |

### 1. General and Materials.

All reagents and solvents were of pure analytical grade. Pd/C (Type 394) is 10 wt% palladium on activated carbon paste with 50 wt% water that purchased from Johnson Matthey (product code: 113390). Thin layer chromatography (TLC) was performed on HSGF254 silica gel, pre-coated on glass-backed plates coated with 0.2 mm silica and revealed with either a UV lamp ( $\lambda_{\text{max}} = 254 \text{ nm}$ ). The products were purified by flash column chromatography on silica gel 200-300 mesh.  $^1\text{H}$  and  $^{13}\text{C}$  NMR spectra were recorded on a 600 MHz spectrometer ( $^1\text{H}$  600 MHz,  $^{13}\text{C}$  151 MHz) using  $\text{CDCl}_3$  or  $d^6$ -DMSO as the solvent with tetramethylsilane (TMS) as the internal standard at room temperature. Chemical shifts are in  $\delta$  (ppm) relative to TMS. The coupling constants (J) are in Hz.

## 2. The Typical Procedure for Pd/C-catalyzed Transfer Hydrogenation of Indoles

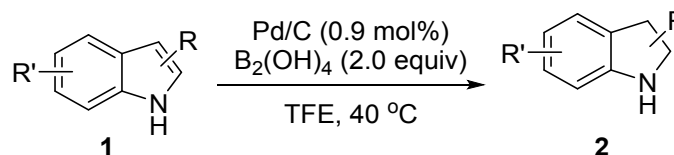

**The Typical Procedure for Pd/C Catalyzed Transfer Hydrogenation of Indoles:** A mixture of indole **1** (0.50 mmol), Pd/C (10.0 mg, 10 wt% palladium on activated carbon paste and 50% moisture, 0.9 mol% [Pd] based on starting material **1**) in 2,2,2-trifluoroethanol (3 mL) was added into a Schlenk flask (25 mL) and stirred at room temperature. Then  $\text{B}_2(\text{OH})_4$  (90 mg, 1.0 mmol, 2.0 equiv) was added and the mixture was stirred at 40 °C. When the reaction was complete monitored by TLC, the solvent was evaporated under reduced pressure and the residue was purified by column chromatography (petroleum ether/ethyl acetate 50:1 to 20:1) to provide indolines **2**.

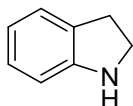

**Indoline (2a):**<sup>[1]</sup> Yield: 99%, 59.2 mg, colorless oil.  $^1\text{H NMR}$  (600 MHz,  $\text{CDCl}_3$ )  $\delta$  7.21 (d,  $J = 7.2$  Hz, 1H), 7.11 (t,  $J = 7.6$  Hz, 1H), 6.80 (t,  $J = 7.3$  Hz, 1H), 6.72 (d,  $J = 7.8$  Hz, 1H), 3.78 (s, 1H), 3.61 (t,  $J = 8.4$  Hz, 2H), 3.11 (t,  $J = 8.4$  Hz, 2H).  $^{13}\text{C NMR}$  (151 MHz,  $\text{CDCl}_3$ )  $\delta$  151.7, 129.4, 127.3, 124.7, 118.7, 109.5, 47.4, 29.9.

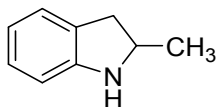

**2-methylindoline (2b):**<sup>[1]</sup> Yield: >99%, 66.5 mg, colorless oil.  $^1\text{H NMR}$  (600 MHz,  $\text{CDCl}_3$ )  $\delta$  7.19 (d,  $J = 7.3$  Hz, 1H), 7.13 (t,  $J = 7.6$  Hz, 1H), 6.81 (t,  $J = 7.4$  Hz, 1H), 6.70 (d,  $J = 7.8$  Hz, 1H), 4.11-4.02 (m, 1H), 3.81 (s, 1H), 3.24 (dd,  $J = 15.4, 8.5$  Hz, 1H), 2.74 (dd,  $J = 15.4, 7.8$  Hz, 1H), 1.38 (d,  $J = 6.3$  Hz, 3H).  $^{13}\text{C NMR}$  (151 MHz,  $\text{CDCl}_3$ )  $\delta$  151.1, 129.0, 127.3, 124.8, 118.6, 109.3, 55.3, 37.9, 22.4.

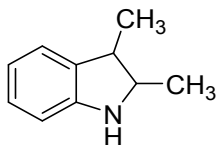

**2,3-dimethylindoline (2c):**<sup>[1]</sup> Yield: 99%, 73.0 mg, colorless oil. <sup>1</sup>H NMR (600 MHz, CDCl<sub>3</sub>)  $\delta$  7.13 (dd,  $J$  = 14.3, 7.4 Hz, 2H), 6.83 (t,  $J$  = 7.4 Hz, 1H), 6.69 (d,  $J$  = 7.7 Hz, 1H), 3.81 (s, 1H), 3.54-3.51 (m, 1H), 2.97-2.85 (m, 1H), 1.40 (dd,  $J$  = 6.6, 3.3 Hz, 6H). <sup>13</sup>C NMR (151 MHz, CDCl<sub>3</sub>)  $\delta$  150.6, 134.4, 127.4, 123.3, 118.7, 109.2, 64.0, 44.4, 20.6, 17.3.

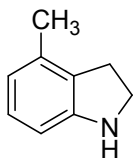

**4-methylindoline (2d):**<sup>[4]</sup> Yield: 96%, 64.1 mg, colorless oil. <sup>1</sup>H NMR (600 MHz, CDCl<sub>3</sub>)  $\delta$  7.05 (t,  $J$  = 7.6 Hz, 1H), 6.66 (d,  $J$  = 7.6 Hz, 1H), 6.59 (d,  $J$  = 7.7 Hz, 1H), 3.76 (s, 1H), 3.64 (t,  $J$  = 8.4 Hz, 2H), 3.06 (t,  $J$  = 8.4 Hz, 2H), 2.34 (s, 3H). <sup>13</sup>C NMR (151 MHz, CDCl<sub>3</sub>)  $\delta$  151.5, 134.3, 128.2, 127.4, 119.9, 107.0, 47.1, 28.7, 18.9.

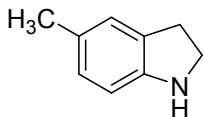

**5-methylindoline (2e):**<sup>[1]</sup> Yield: >99%, 66.4 mg, colorless oil. <sup>1</sup>H NMR (600 MHz, CDCl<sub>3</sub>)  $\delta$  7.02 (s, 1H), 6.90 (d,  $J$  = 7.8 Hz, 1H), 6.63 (d,  $J$  = 7.8 Hz, 1H), 3.63 (brs, 1H), 3.58 (t,  $J$  = 8.3 Hz, 2H), 3.06 (t,  $J$  = 8.3 Hz, 2H), 2.33 (s, 3H). <sup>13</sup>C NMR (151 MHz, CDCl<sub>3</sub>)  $\delta$  149.2, 129.8, 128.1, 127.6, 125.5, 109.5, 47.6, 30.0, 20.8.

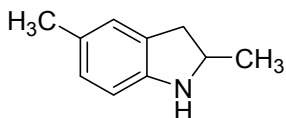

**2,5-dimethylindoline (2f):**<sup>[2]</sup> Yield: 98%, 72.0 mg, colorless oil. <sup>1</sup>H NMR (600 MHz, CDCl<sub>3</sub>)  $\delta$  6.96 (s, 1H), 6.87 (d,  $J$  = 7.8 Hz, 1H), 6.57 (d,  $J$  = 7.8 Hz, 1H), 4.03-3.98 (m, 1H), 3.55 (brs, 1H), 3.15 (dd,  $J$  = 15.3, 8.4 Hz, 1H), 2.65 (dd,  $J$  = 15.3, 7.8 Hz, 1H), 2.29 (s, 3H), 1.33 (d,  $J$  = 6.2 Hz, 3H). <sup>13</sup>C NMR (151 MHz, CDCl<sub>3</sub>)  $\delta$  148.5, 129.3, 128.0, 127.5, 125.6, 109.3, 55.5, 37.9, 22.3, 20.8.

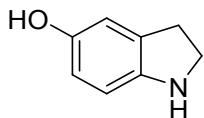

**indolin-5-ol (2g):**<sup>[5]</sup> Yield: 90%, 60.6 mg, brown solid, m.p. 113-115 °C. <sup>1</sup>H NMR (600 MHz, DMSO)  $\delta$  6.60 (dd,  $J$  = 1.7, 1.0 Hz, 1H), 6.44 (d,  $J$  = 1.8 Hz, 2H), 3.43-3.39 (m, 2H), 2.88 (dd,  $J$  = 12.2, 4.4 Hz, 2H). <sup>13</sup>C NMR (151 MHz, DMSO)  $\delta$  150.3, 143.6, 131.0, 113.3, 112.3, 110.4, 47.4, 30.2.

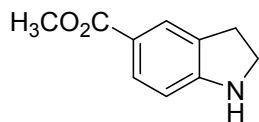

**methyl indoline-5-carboxylate (2h):**<sup>[1]</sup> Yield: 92%, 81.2 mg, colorless oil. <sup>1</sup>H NMR (600 MHz, CDCl<sub>3</sub>)  $\delta$  7.77 (dd,  $J$  = 4.0, 2.7 Hz, 2H), 6.55 (d,  $J$  = 8.6 Hz, 1H), 4.30 (brs, 1H), 3.86 (s, 3H), 3.66 (t,  $J$  = 8.6 Hz, 2H), 3.07 (t,  $J$  = 8.5 Hz, 2H). <sup>13</sup>C NMR (151 MHz, CDCl<sub>3</sub>)  $\delta$  167.5, 156.0, 130.7, 128.7, 126.1, 119.6, 107.4, 51.5, 47.3, 28.9.

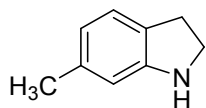

**6-methylindoline (2i):**<sup>[3]</sup> Yield: 98%, 65.2 mg, colorless oil. <sup>1</sup>H NMR (600 MHz, CDCl<sub>3</sub>)  $\delta$  7.09 (d,  $J$  = 7.3 Hz, 1H), 6.62 (d,  $J$  = 7.3 Hz, 1H), 6.56 (s, 1H), 3.69 (s, 1H), 3.60 (t,  $J$  = 8.3 Hz, 2H), 3.06 (t,  $J$  = 8.3 Hz, 2H), 2.36 (s, 3H). <sup>13</sup>C NMR (151 MHz, CDCl<sub>3</sub>)  $\delta$  151.9, 137.1, 126.5, 124.3, 119.4, 110.5, 47.6, 29.6, 21.5.

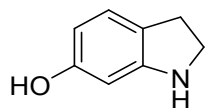

**indolin-6-ol (2j):**<sup>[5]</sup> Yield: 89%, 59.8 mg, brown solid, m.p. 102-104 °C. <sup>1</sup>H NMR (600 MHz, DMSO)  $\delta$  8.75 (s, 1H), 6.76 (d,  $J$  = 7.8 Hz, 1H), 5.9-5.934 (m, 2H), 5.33 (s, 1H), 3.36 (t,  $J$  = 8.3 Hz, 2H), 2.76 (t,  $J$  = 8.3 Hz, 2H). <sup>13</sup>C NMR (151 MHz, DMSO)  $\delta$  157.4, 154.2, 124.7, 119.4, 104.0, 97.0, 47.4, 28.9.

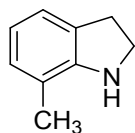

**7-methylindoline (2k):**<sup>[4]</sup> Yield: 99%, 65.9 mg, colorless oil. <sup>1</sup>H NMR (600 MHz, CDCl<sub>3</sub>)  $\delta$  7.06 (d,  $J$  = 7.3 Hz, 1H), 6.93 (d,  $J$  = 7.5 Hz, 1H), 6.73 (t,  $J$  = 7.4 Hz, 1H), 3.62 (t,  $J$  = 8.4 Hz, 2H), 3.52 (brs, 1H), 3.12 (t,  $J$  = 8.4 Hz, 2H), 2.20 (s, 3H). <sup>13</sup>C NMR (151 MHz, CDCl<sub>3</sub>)  $\delta$  150.1, 128.7, 128.2, 122.2, 119.0, 118.9, 47.2, 30.2, 16.9.

### 3. Mechanism Study

**<sup>1</sup>H NMR Study:** 2-methylindole (66 mg, 0.50 mmol) was added to CF<sub>3</sub>CH<sub>2</sub>OD (1.5 mL) and stirred for 6 h at 40 °C. The solvent was evaporated under reduced pressure at 40 °C and the residue was obtained.

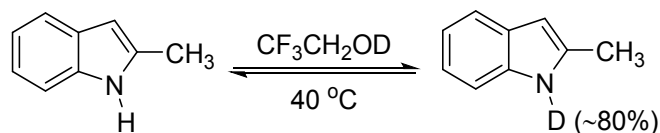

According to  $^1\text{H-NMR}$  spectrum, it was indicated that hydrogen-deuterium exchange process existed between  $\text{CF}_3\text{CH}_2\text{OD}$  and 2-methylindole to form 2-methyl-1*H*-indole-1-*d* (**Figure 1**).

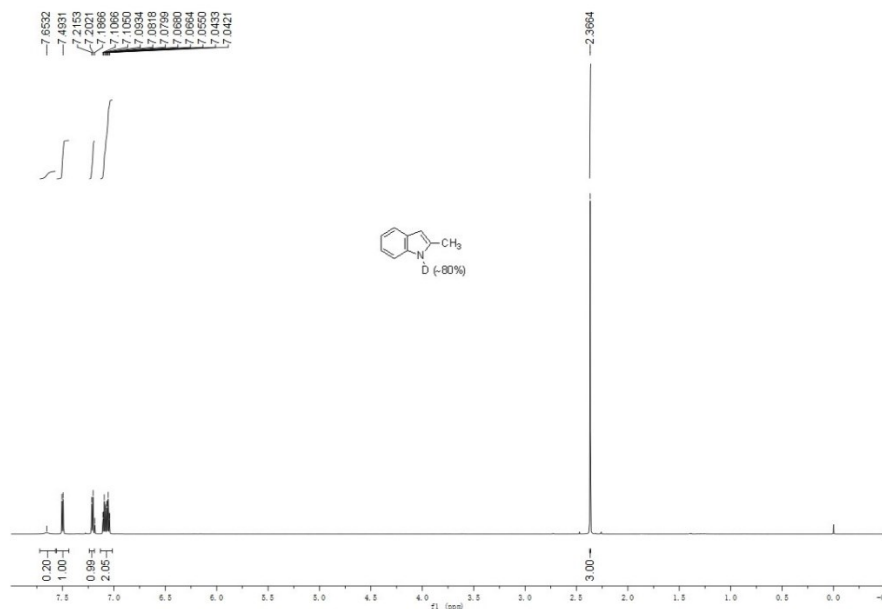

**Figure 1.**  $^1\text{H NMR}$  of 2-methylindole in  $\text{CF}_3\text{CH}_2\text{OD}$

**Pd/C Catalyzed Transfer Hydrogenation of 2-methylindole in TFE:** A mixture of 2-methylindole **1b** (66 mg, 0.50 mmol), Pd/C (10.0 mg, 10 wt% palladium on activated carbon paste and 50% moisture, 0.9 mol% [Pd] based on **1b**) in TFE (3 mL) was added into a Schlenk flask (25 mL) and stirred at room temperature. Then  $\text{B}_2(\text{OH})_4$  (90 mg, 1.0 mmol, 2.0 equiv) was added and the mixture was stirred at 40 °C. When the reaction was complete monitored by TLC (24 h), the reaction solution was filtered.

The analysis of  $^{19}\text{F}$  NMR of the filtrate showed that the peak at  $\delta$  -76.06 was a new fluorine-containing compound. It was suggested that  $\text{CF}_3\text{CH}_2\text{OB}(\text{OH})_2$  might be formed in the reaction system (**Figure 2**).

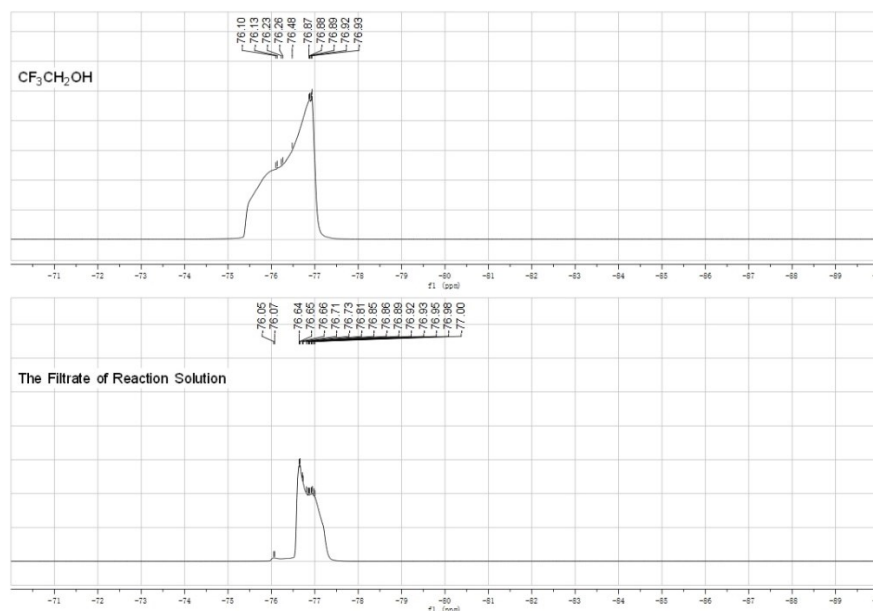

**Figure 2.**  $^{19}\text{F}$  NMR of  $\text{CF}_3\text{CH}_2\text{OH}$  and Reaction Solution

**Pd/C Catalyzed Transfer Hydrogenation of 2-methylindole in 2,2,2-trifluoroethan-1-ol-*d* ( $\text{CF}_3\text{CH}_2\text{OD}$ ):** A mixture of 2-methylindole **1b** (66 mg, 0.50 mmol), Pd/C (10.0 mg, 10 wt% palladium on activated carbon paste and 50% moisture, 0.9 mol% [Pd] based on **1b**) in  $\text{CF}_3\text{CH}_2\text{OD}$  (3 mL) was added into a Schlenk flask (25 mL) and stirred at room temperature. Then  $\text{B}_2(\text{OH})_4$  (90 mg, 1.0 mmol, 2.0 equiv) was added and the mixture was stirred at 40 °C. When the reaction was complete monitored by TLC (48 h), the solvent was evaporated under reduced pressure and the residue was purified by column chromatography (petroleum ether/ethyl acetate 50:1 to 30:1) to provide 2-methylindoline (colorless oil, 45.2 mg).

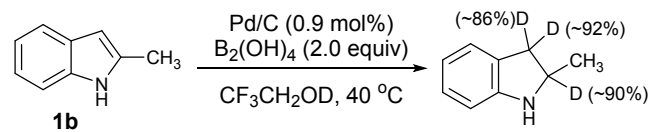

The analysis of  $^1\text{H}$  NMR of the product showed that three deuterium atoms were imported to the 2- (~86% and ~92%) and 3-position (~90%). A hydrogen-deuterium exchange process existed between  $\text{CF}_3\text{CH}_2\text{OD}$  and  $\text{B}_2(\text{OH})_4$  to form  $\text{B}_2(\text{OD})_4$ . The two deuterium atoms of 3-position suggested that a reversible process of protonation and deprotonation existed (**Figure 3**).

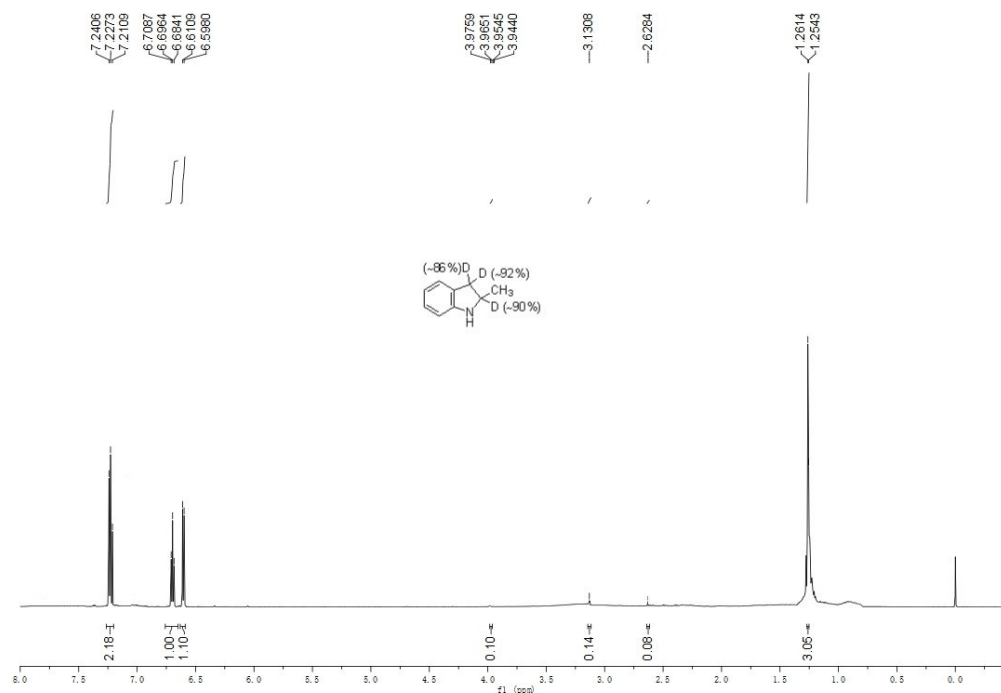

**Figure 3.**  $^1\text{H}$  NMR of Product 1b in  $\text{CF}_3\text{CH}_2\text{OD}$

#### 4. References

- (1) Kulkarni, A.; Zhou, W.; Török, B. *Org. Lett.* **2011**, *13*, 5124.
- (2) Wang, D.-S.; Chen, Q.-A.; Li, W.; Yu, C.-B.; Zhou, Y.-G.; Zhang, X. *J. Am. Chem. Soc.* **2010**, *132*, 8909.
- (3) Walkington, A.; Gray, M.; Hossner, F.; Kitteringham, J.; Voyle, M. *Synth. Commun.* **2003**, *33*, 2229.
- (4) Sato, K.; Sugimoto, H.; Rikimaru, K.; Imoto, H.; Kamaura, M.; Negoro, N.; Tsujihata, Y.; Miyashita, H.; Odani, T.; Murata, T. *Bioorgan. Med. Chem.* **2014**, *22*, 1649.
- (5) Berrier, C.; Jacquesy, J.-C.; Jouannetaud, M.-P.; Renoux, A. *Tetrahedron Lett.* **1986**, *27*, 4565.



## 5. Copy of NMR for the Indolines

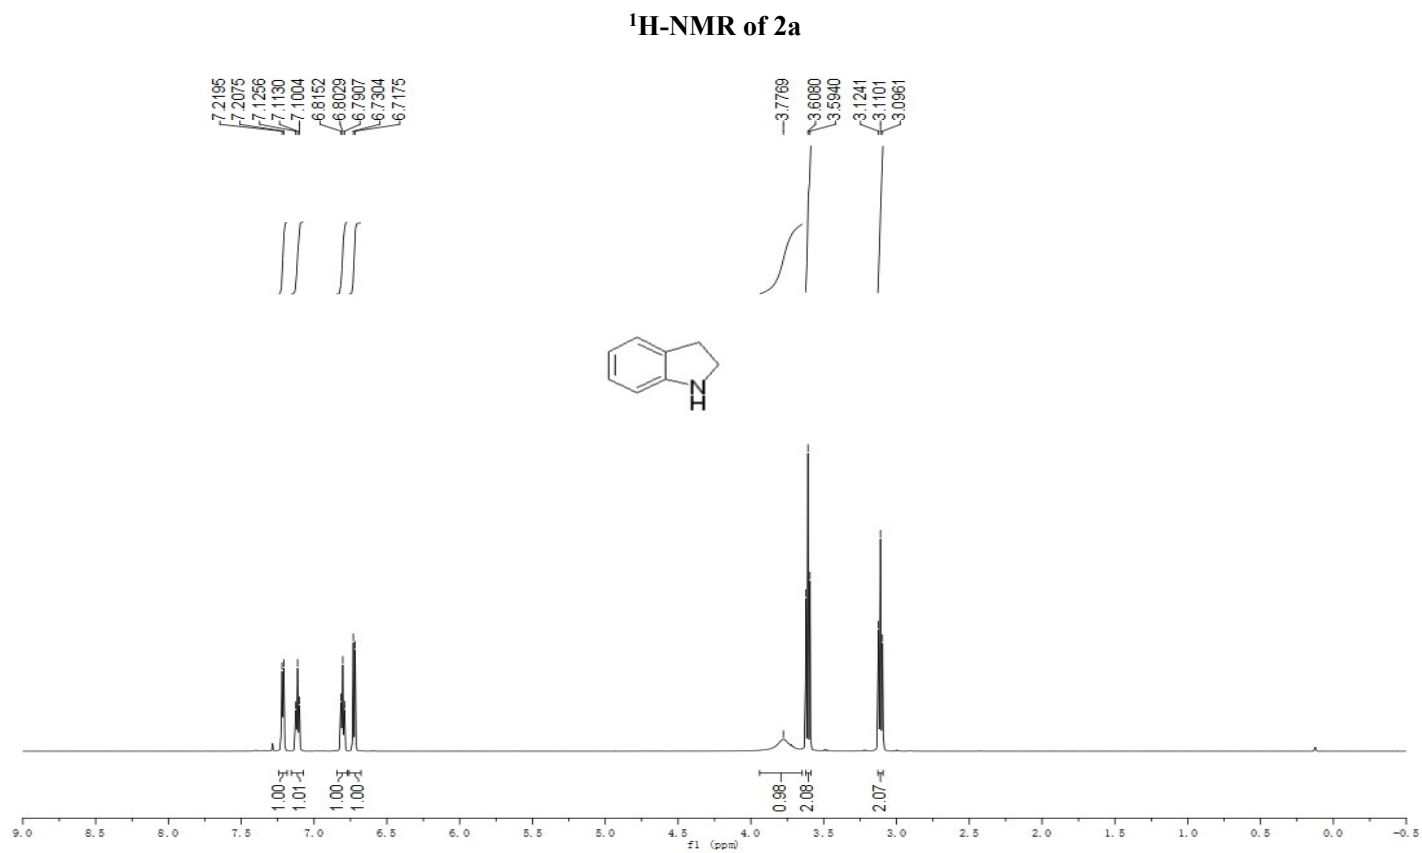

<sup>13</sup>C-NMR of 2a

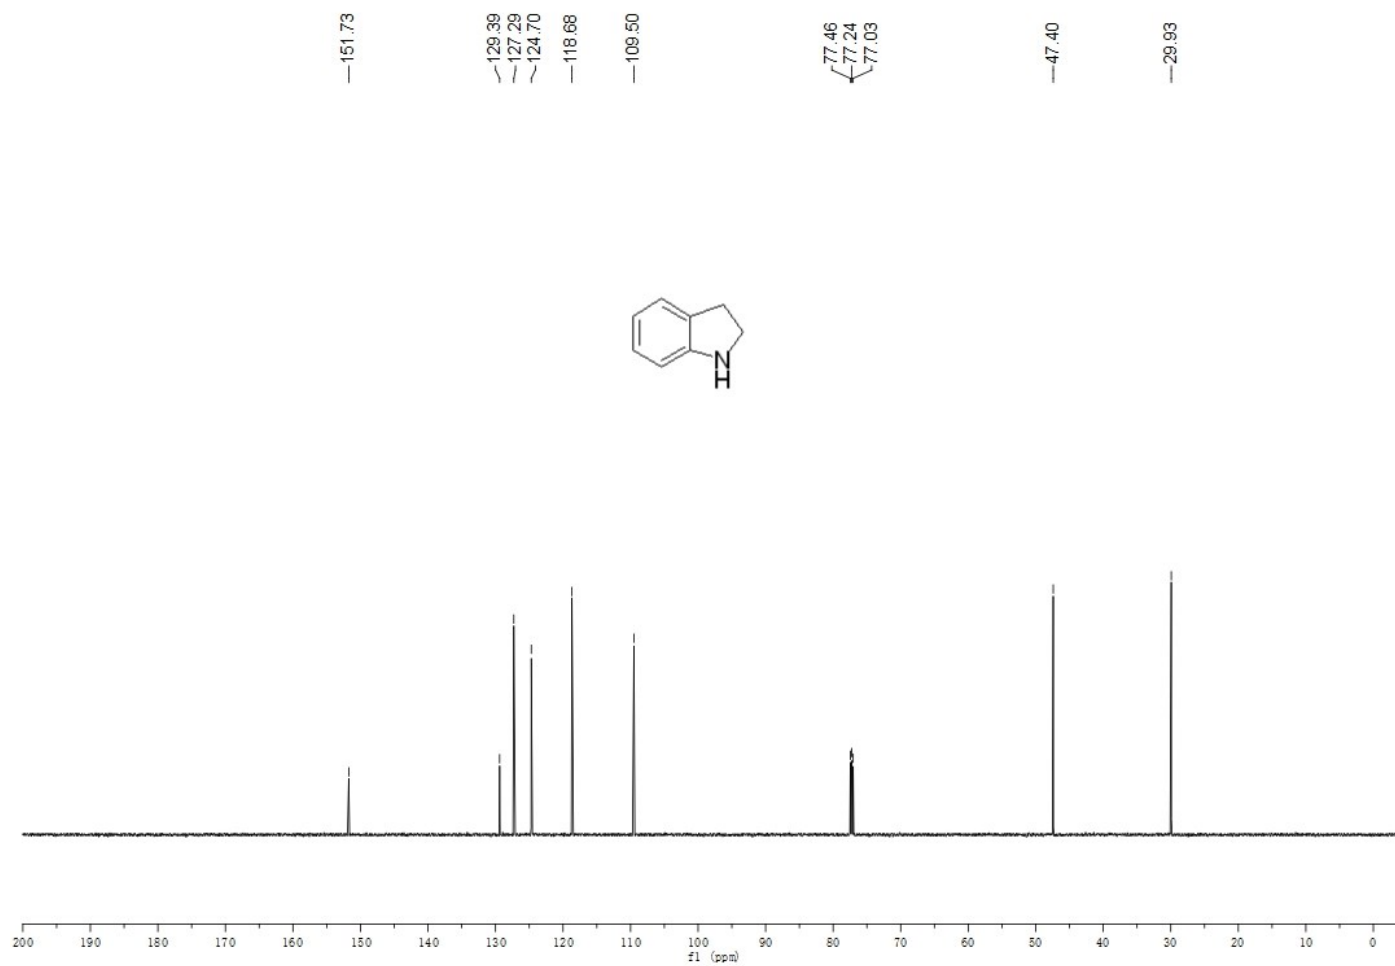

**<sup>1</sup>H-NMR of 2b**

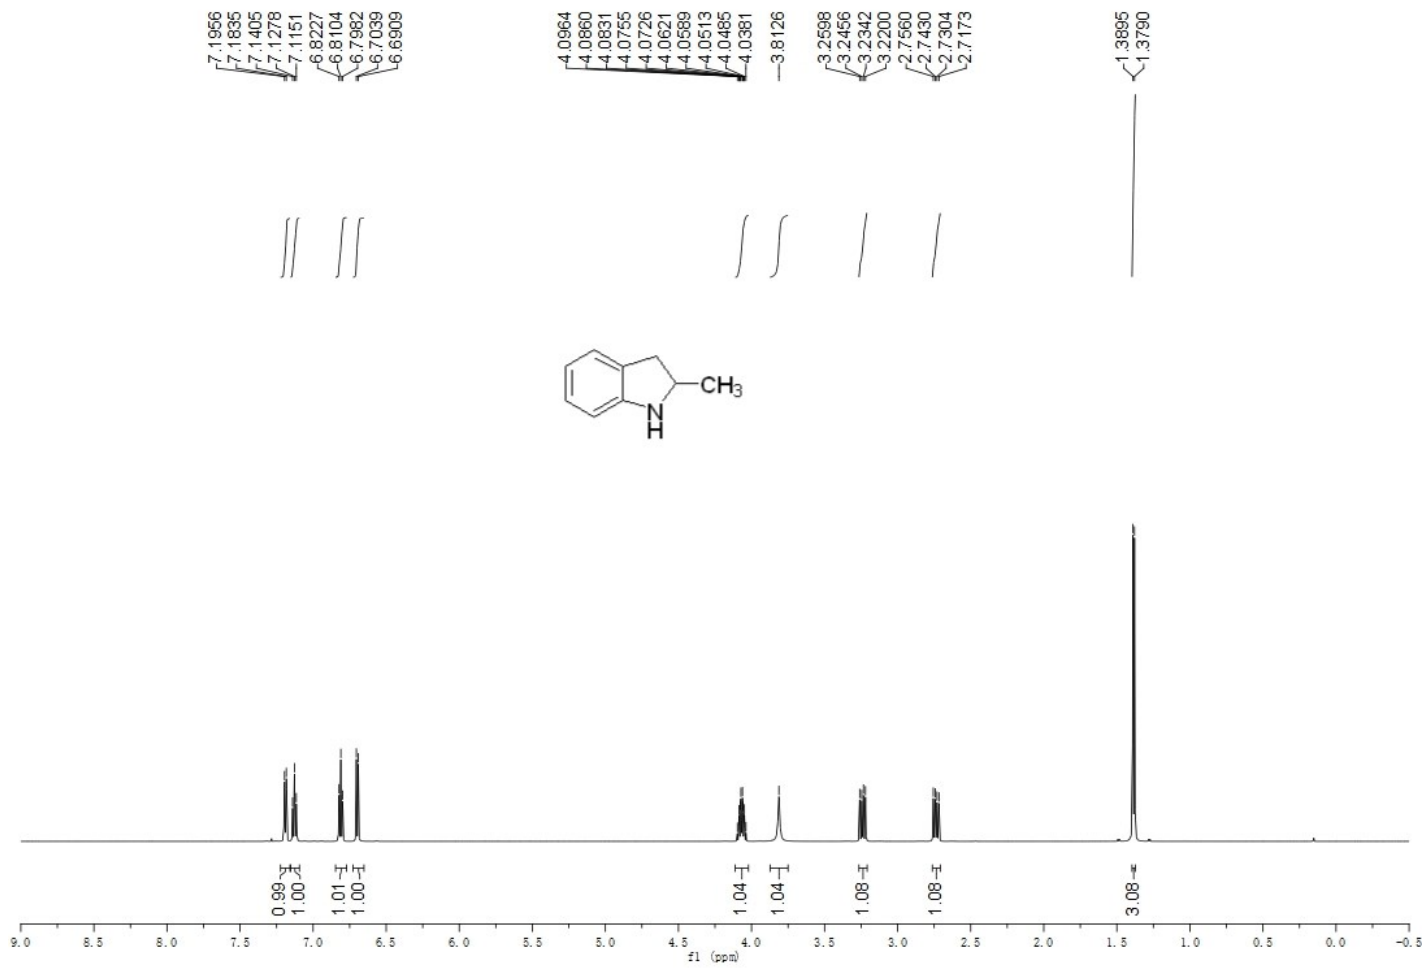

<sup>13</sup>C-NMR of 2b

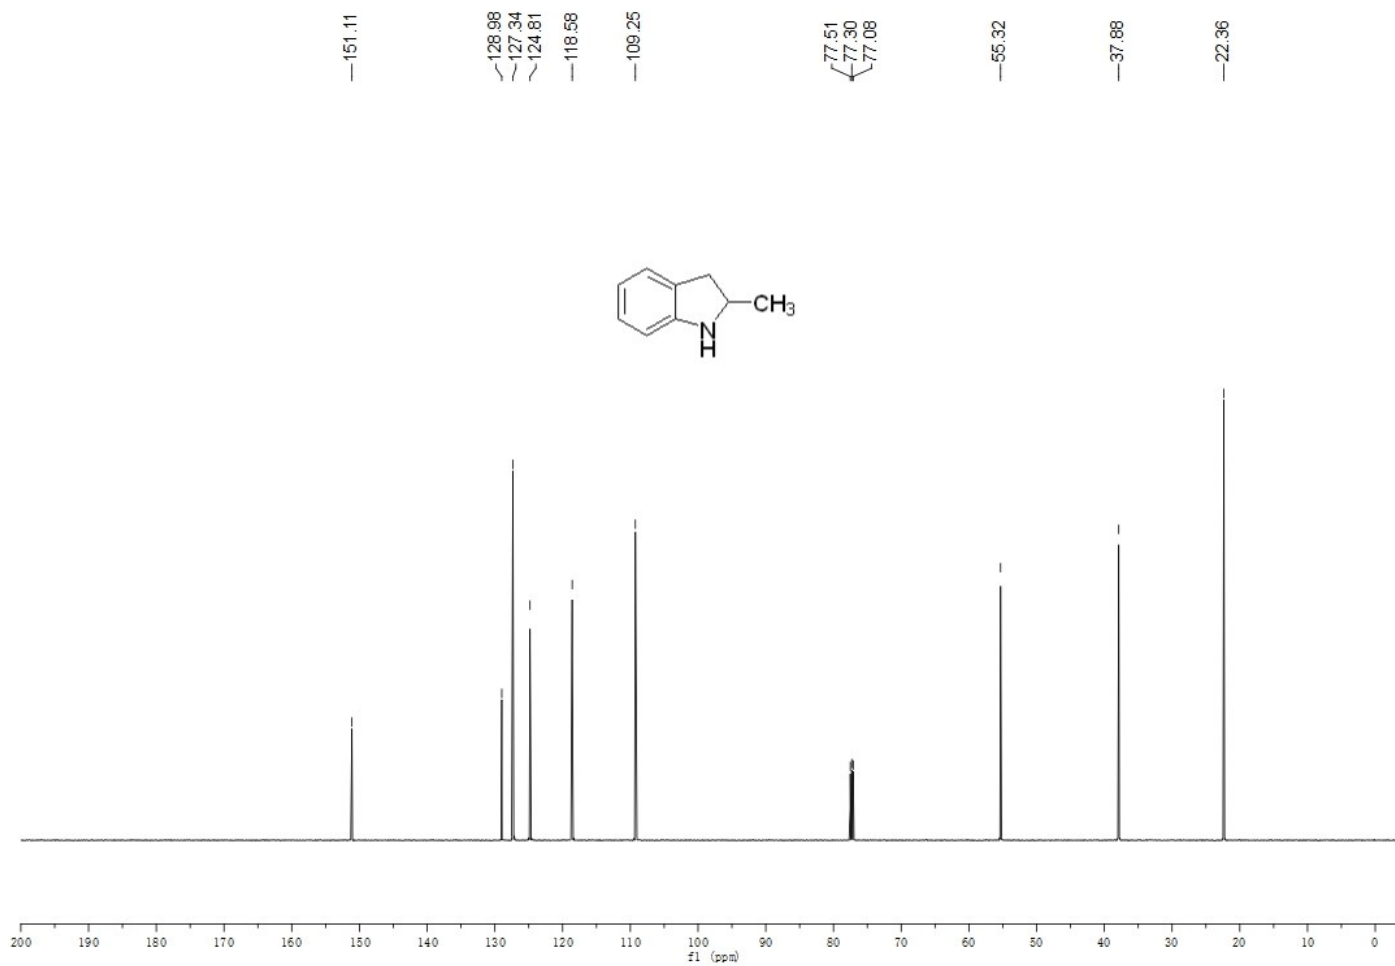

**<sup>1</sup>H-NMR of 2c**

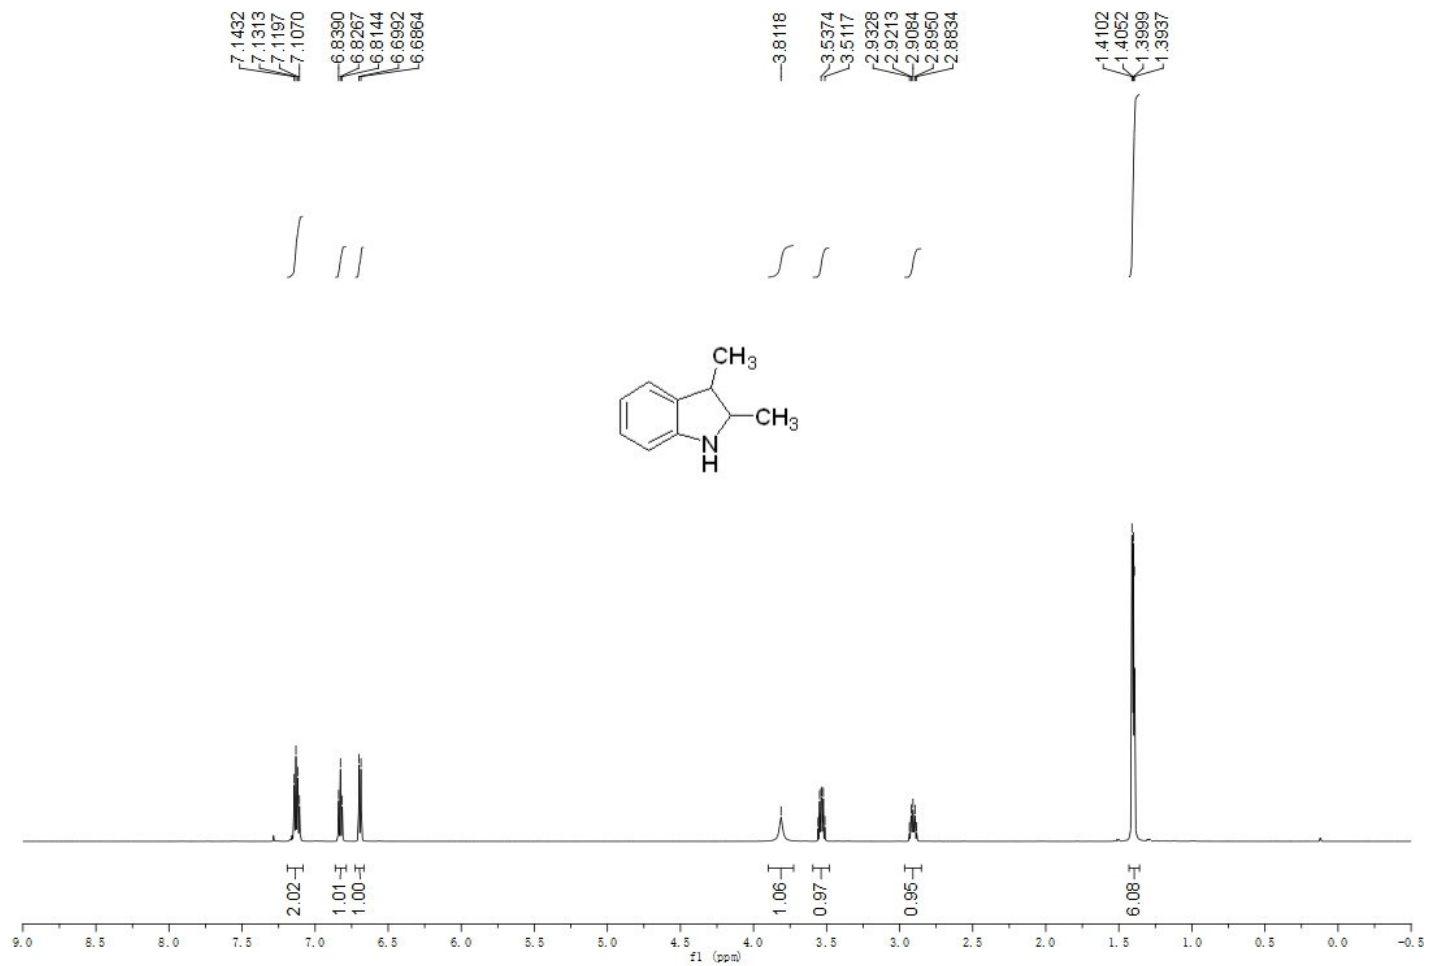

<sup>13</sup>C-NMR of 2c

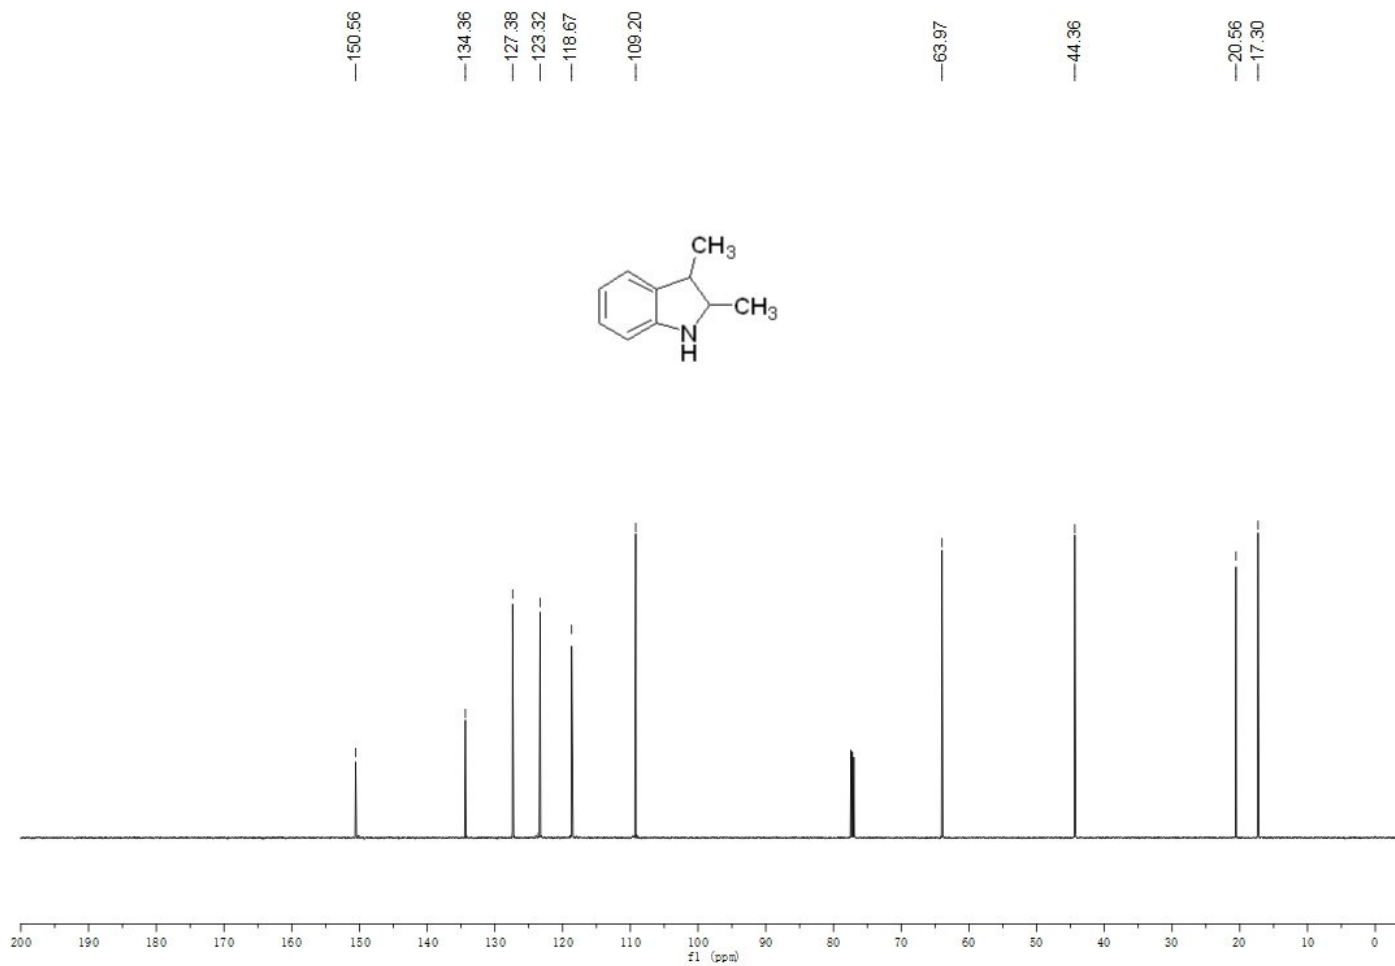

<sup>1</sup>H-NMR of 2d

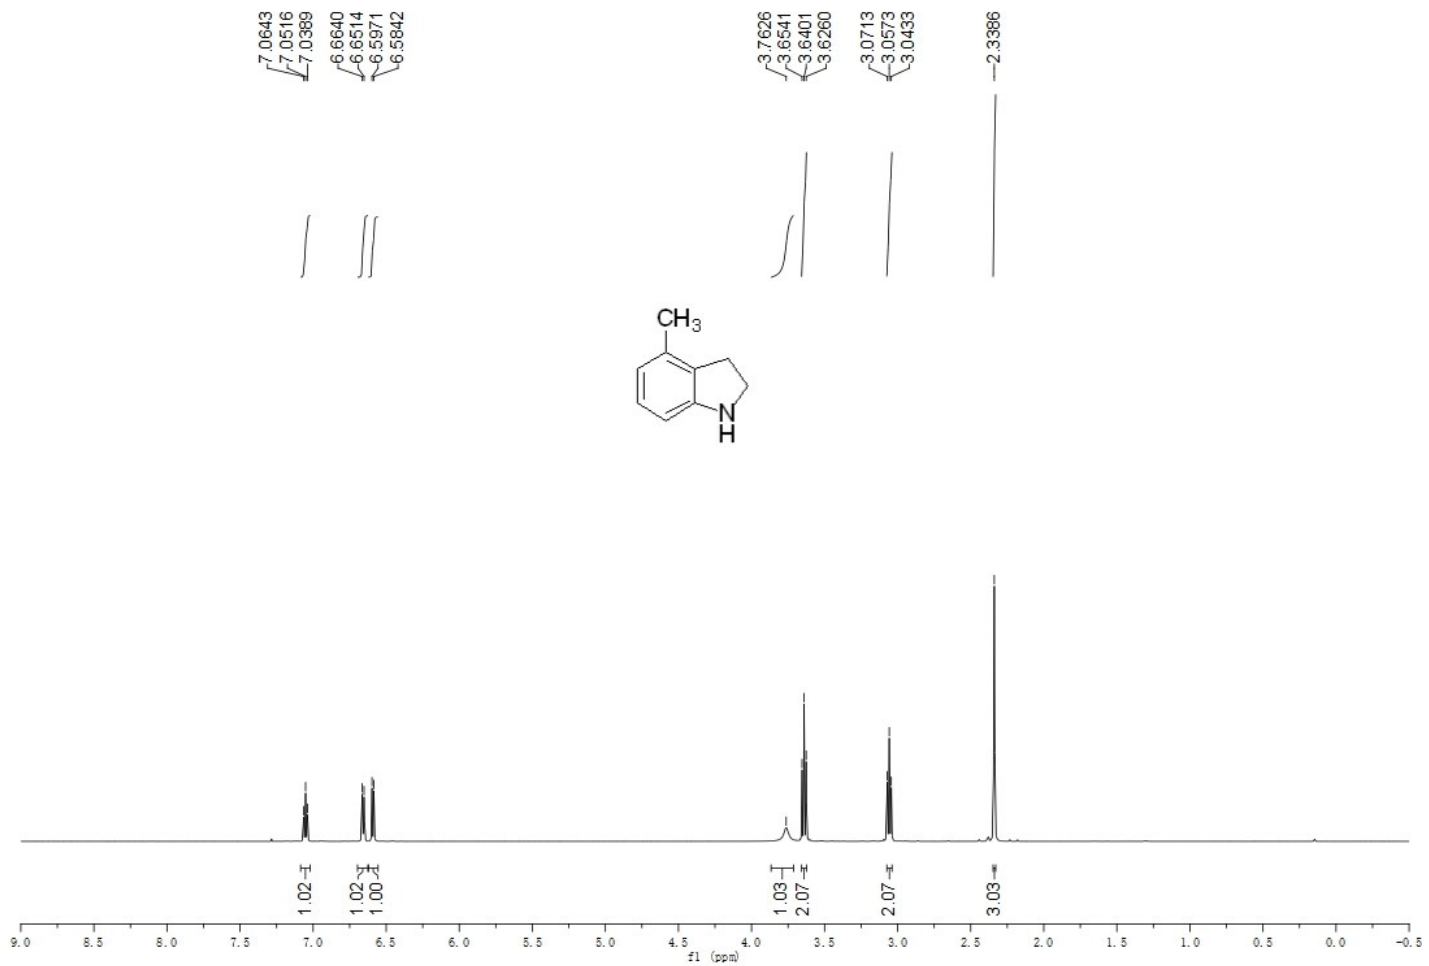

<sup>13</sup>C-NMR of 2d

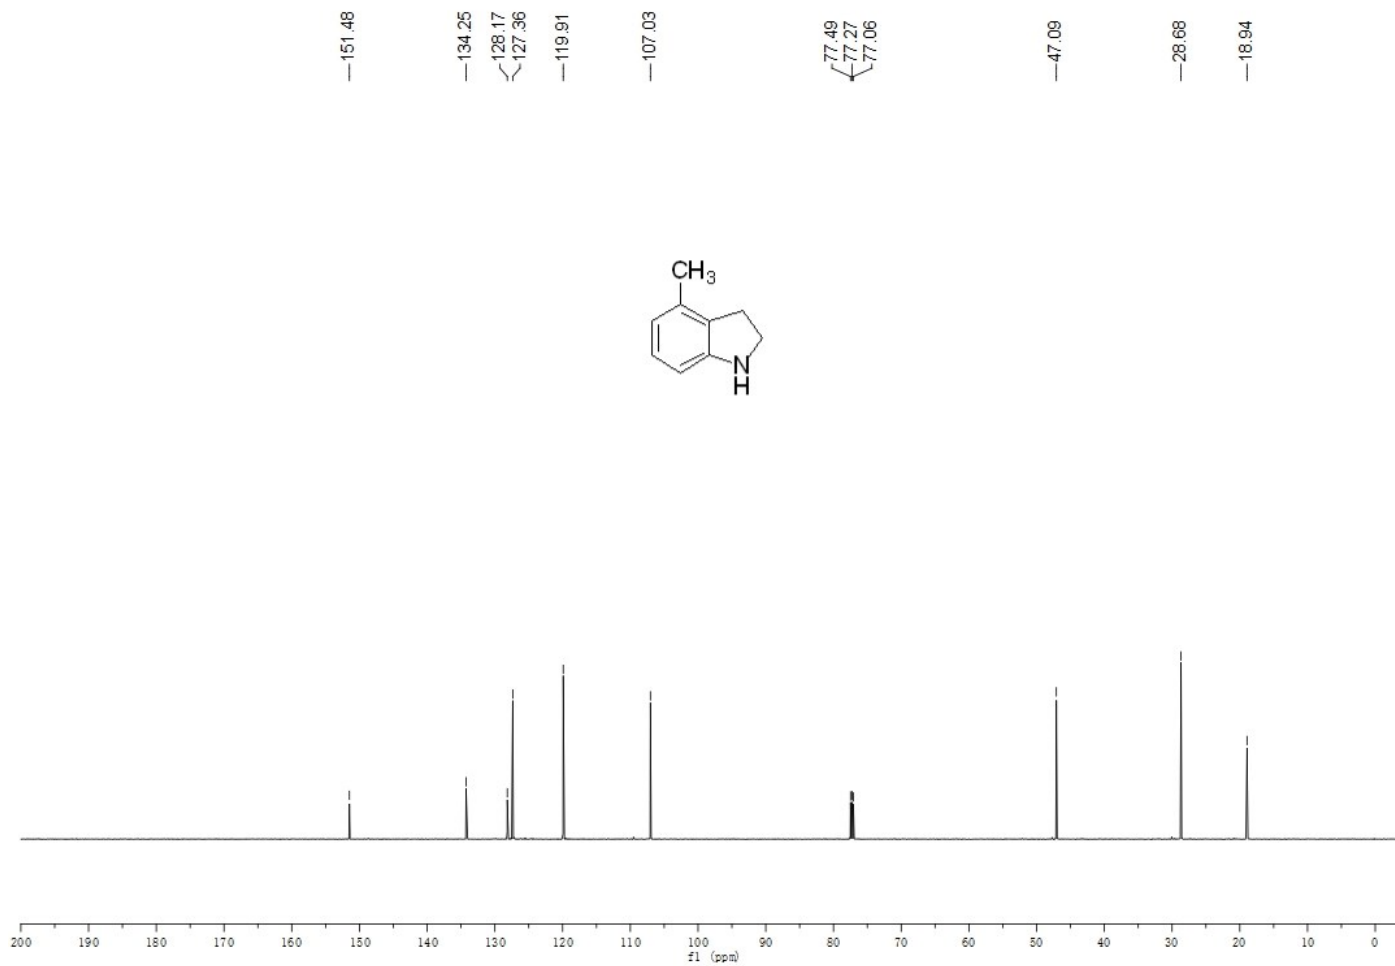



**<sup>1</sup>H-NMR of 2e**

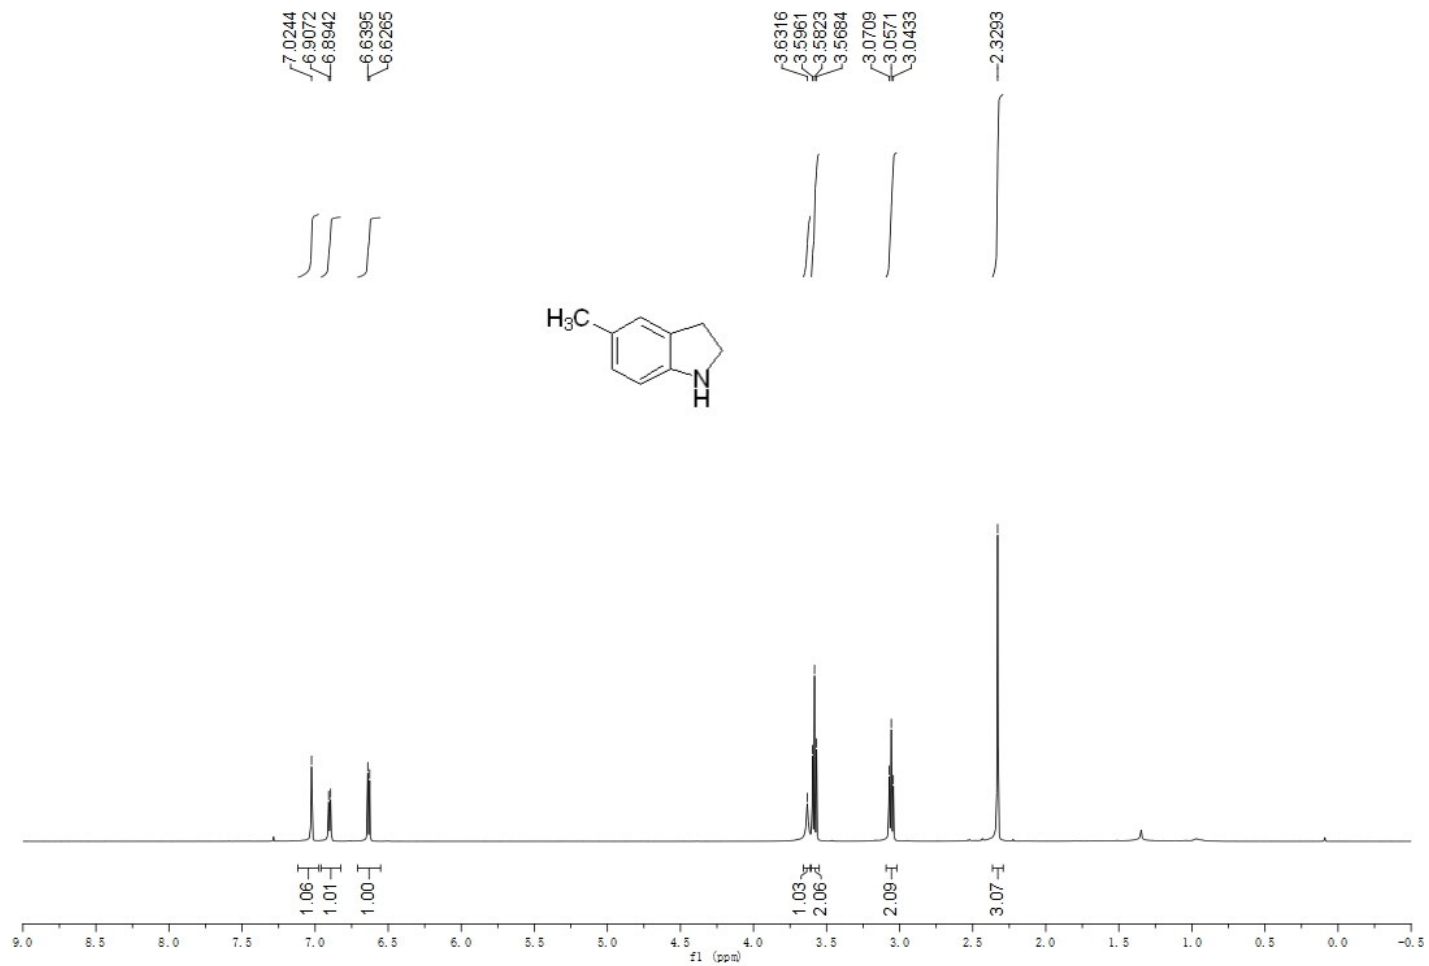

<sup>13</sup>C-NMR of 2e

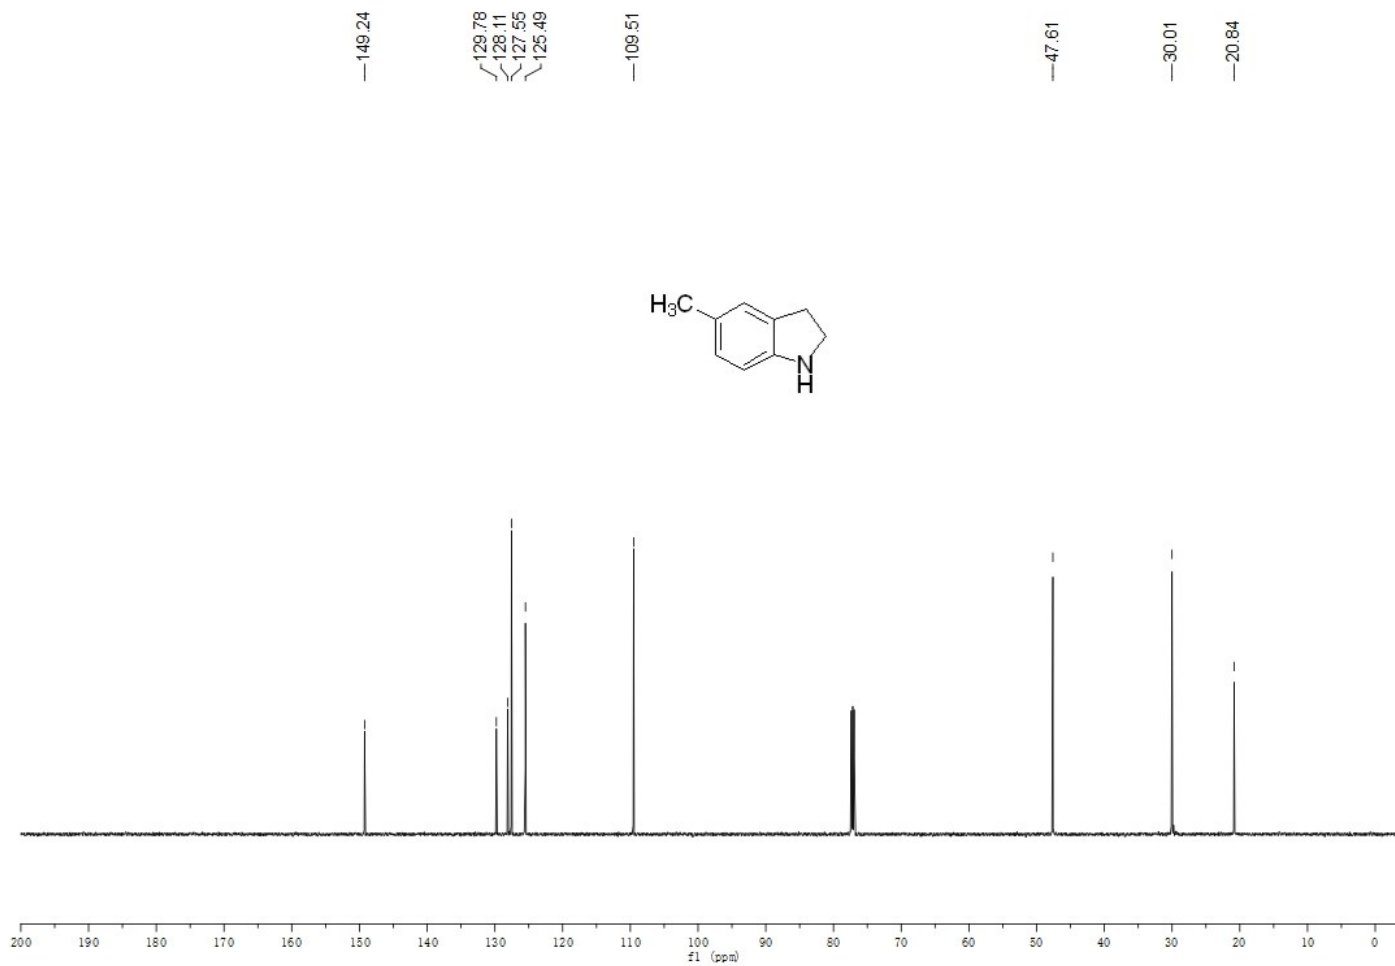

**<sup>1</sup>H-NMR of 2f**

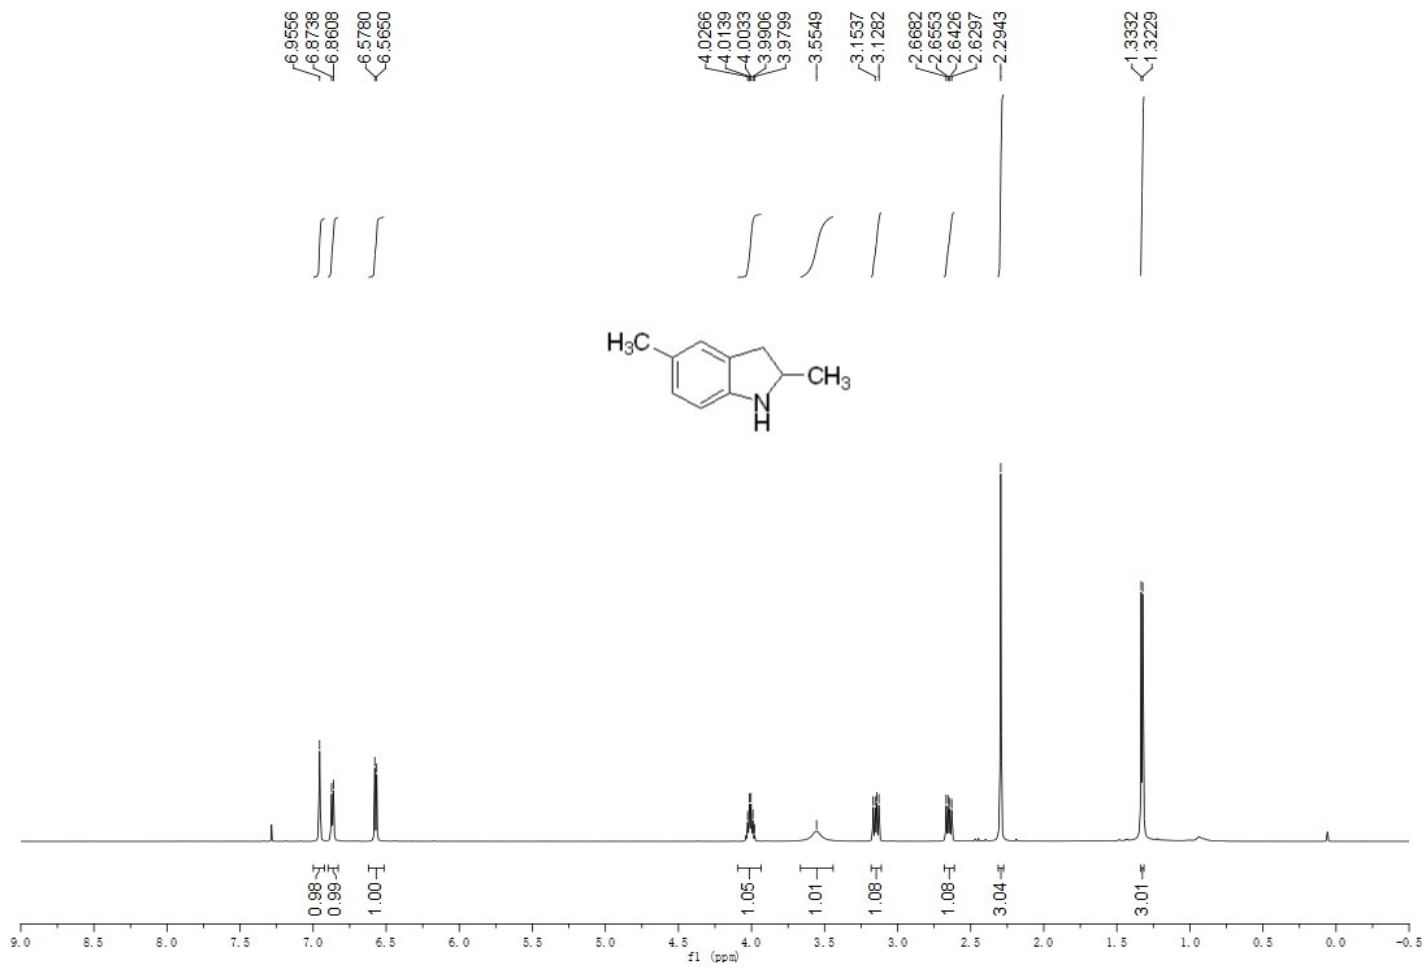

<sup>13</sup>C-NMR of 2f

—148.52

129.34  
128.01  
127.54  
125.56

—109.27

—55.46

—37.88

22.25  
20.83

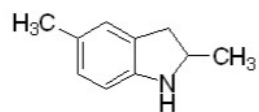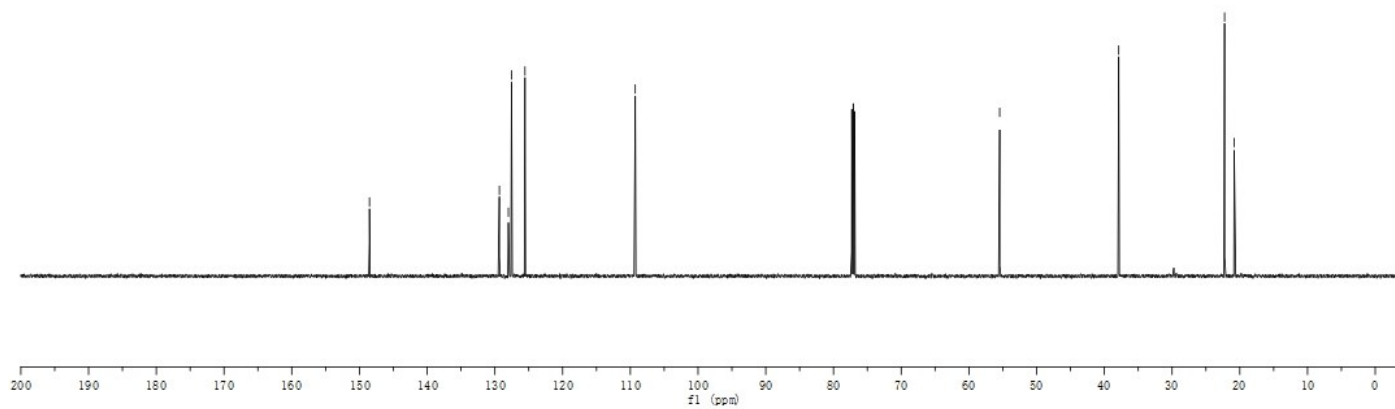

**<sup>1</sup>H-NMR of 2g**

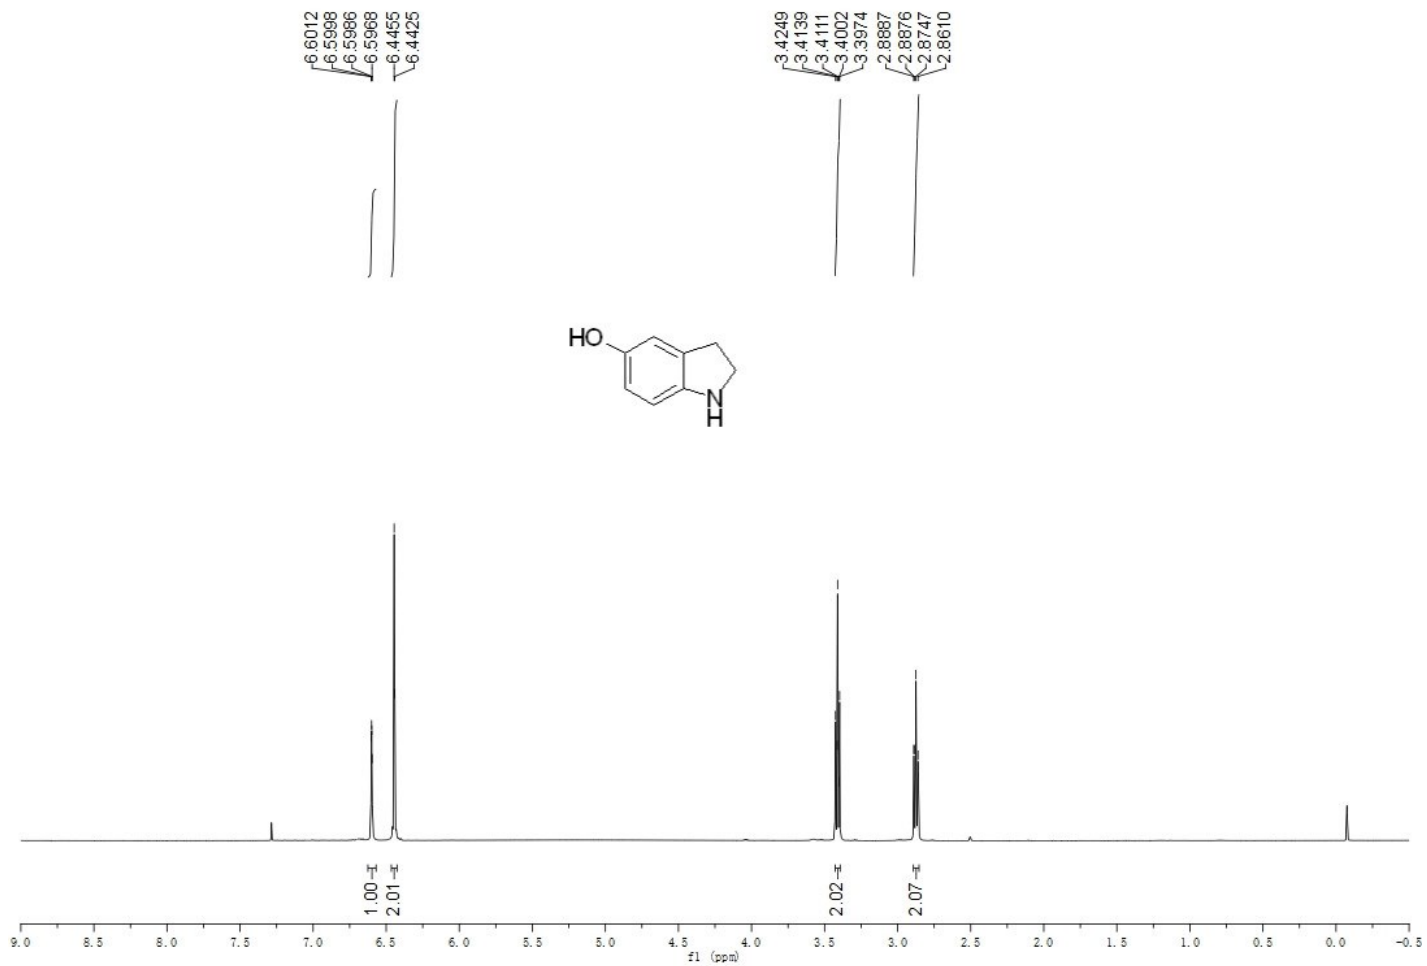

<sup>13</sup>C-NMR of 2g

—150.34

—143.60

—131.02

—113.25

—112.28

—110.42

—47.37

—39.81

—39.67

—39.63

—30.23

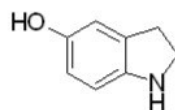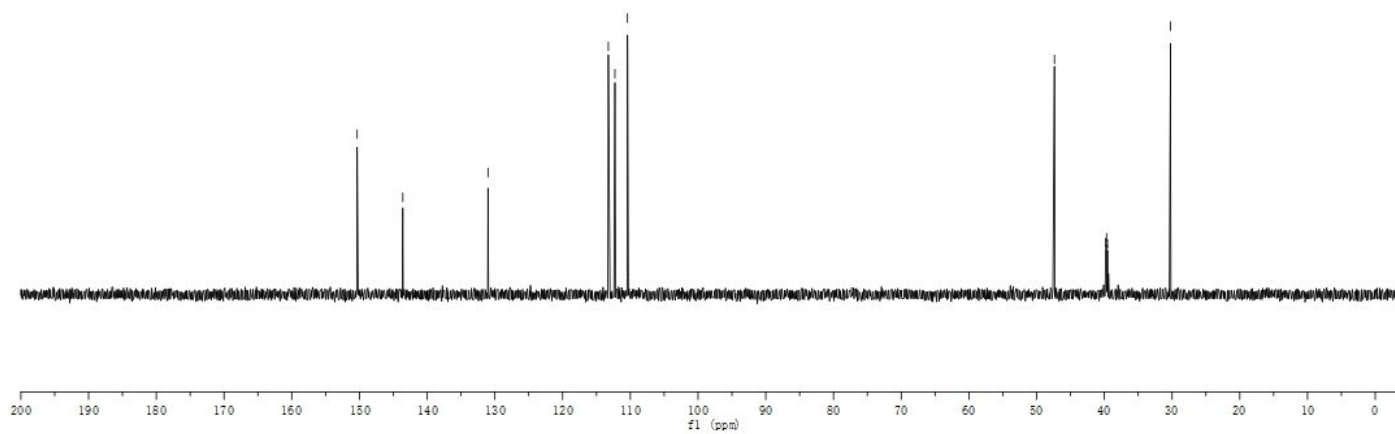

**<sup>1</sup>H-NMR of 2h**

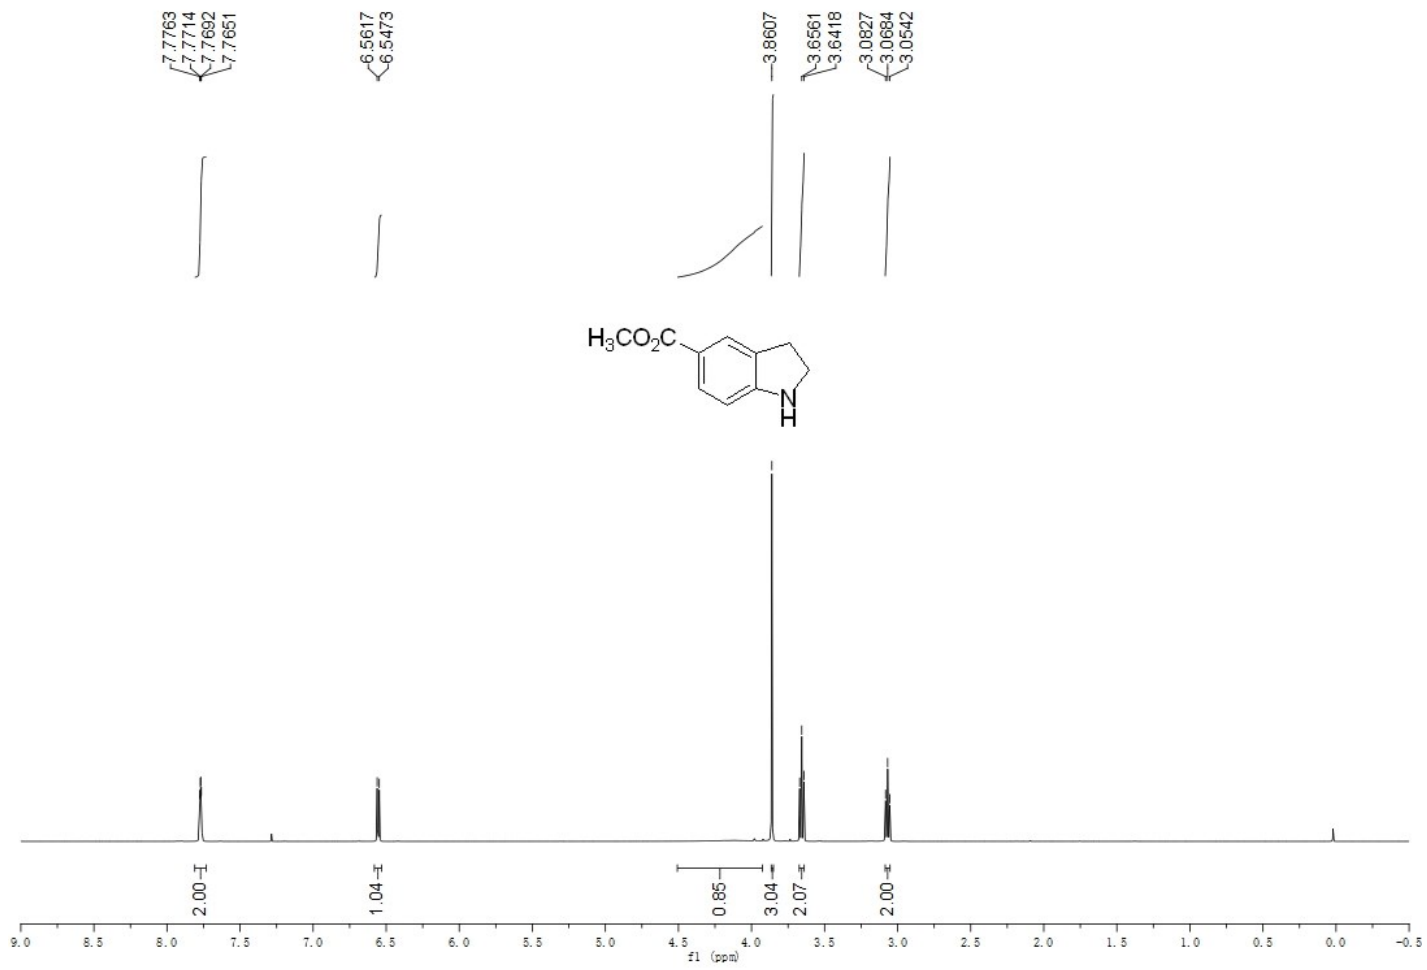

<sup>13</sup>C-NMR of 2h

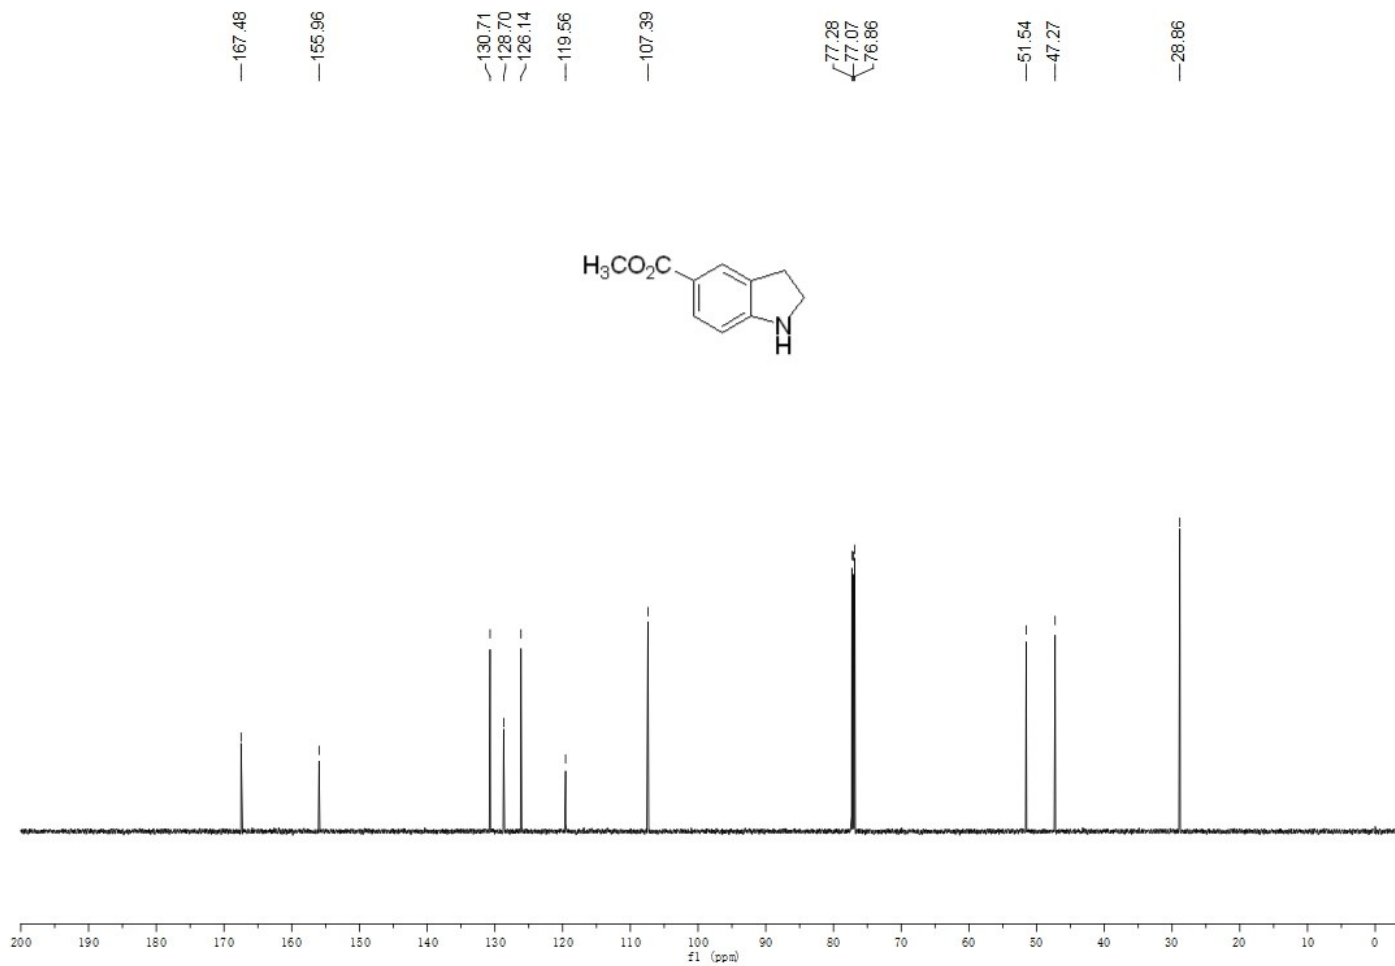



<sup>1</sup>H-NMR of 2i

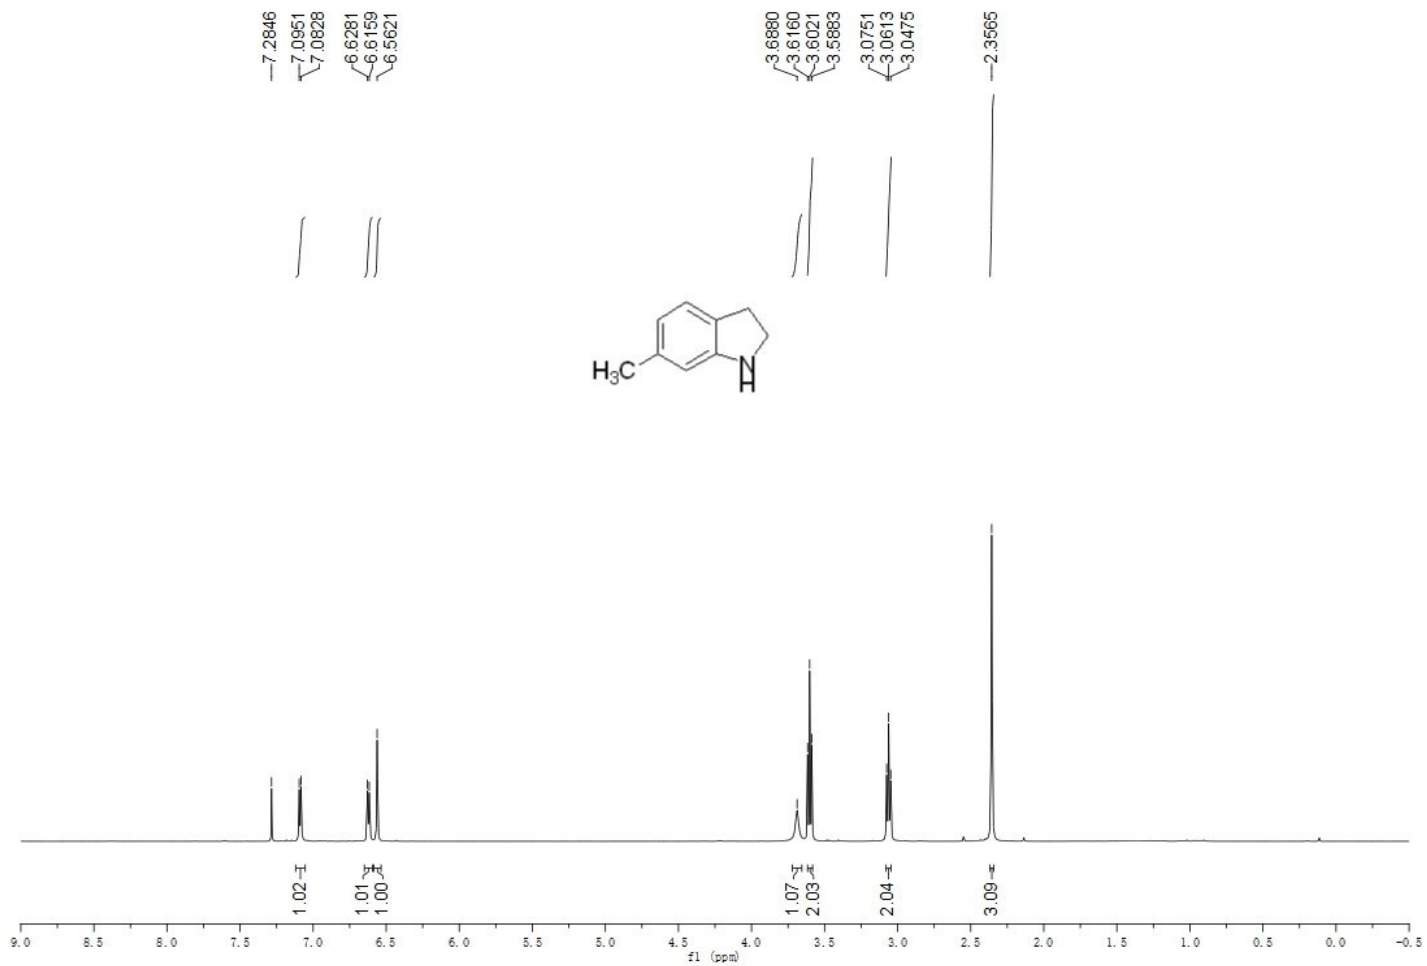

<sup>13</sup>C-NMR of 2i

—151.91  
—137.10  
—126.48  
—124.34  
—119.43  
—110.47  
77.42  
77.21  
76.99  
—47.64  
—29.57  
—21.53

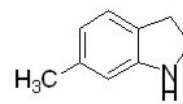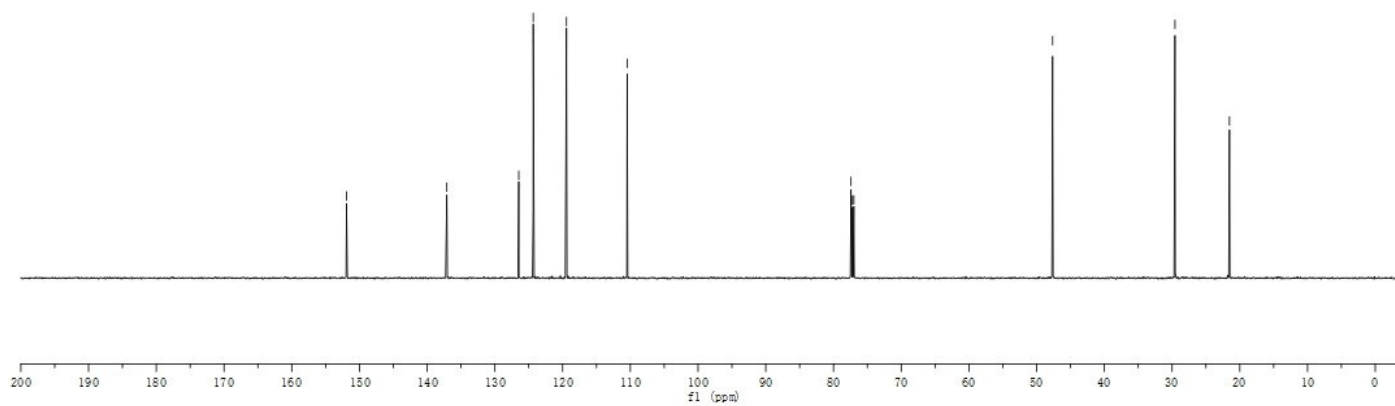

**<sup>1</sup>H-NMR of 2j**

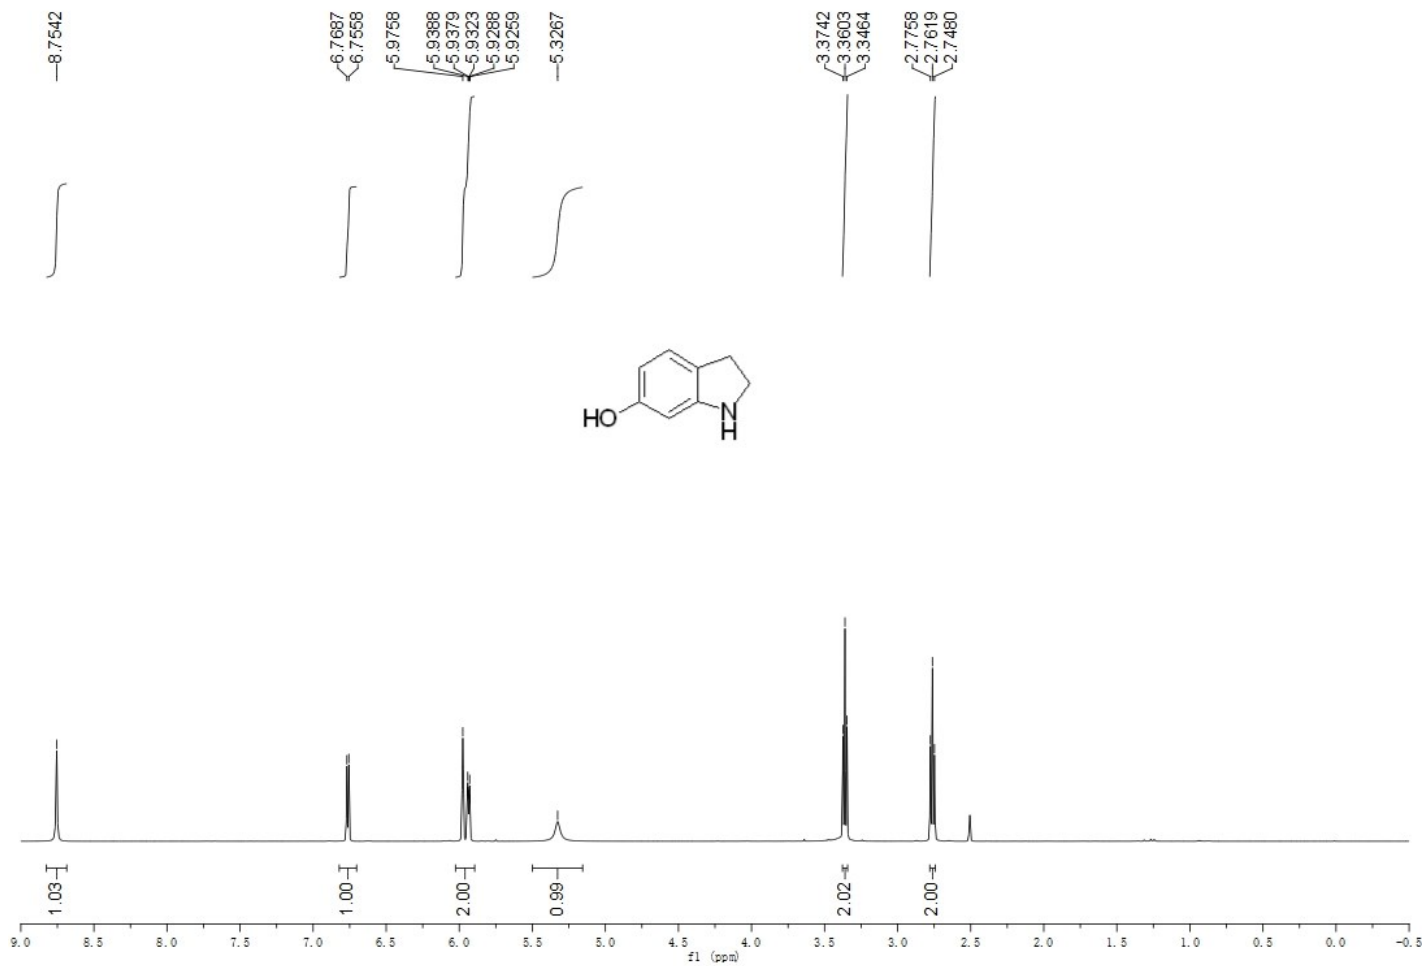

<sup>13</sup>C-NMR of 2j

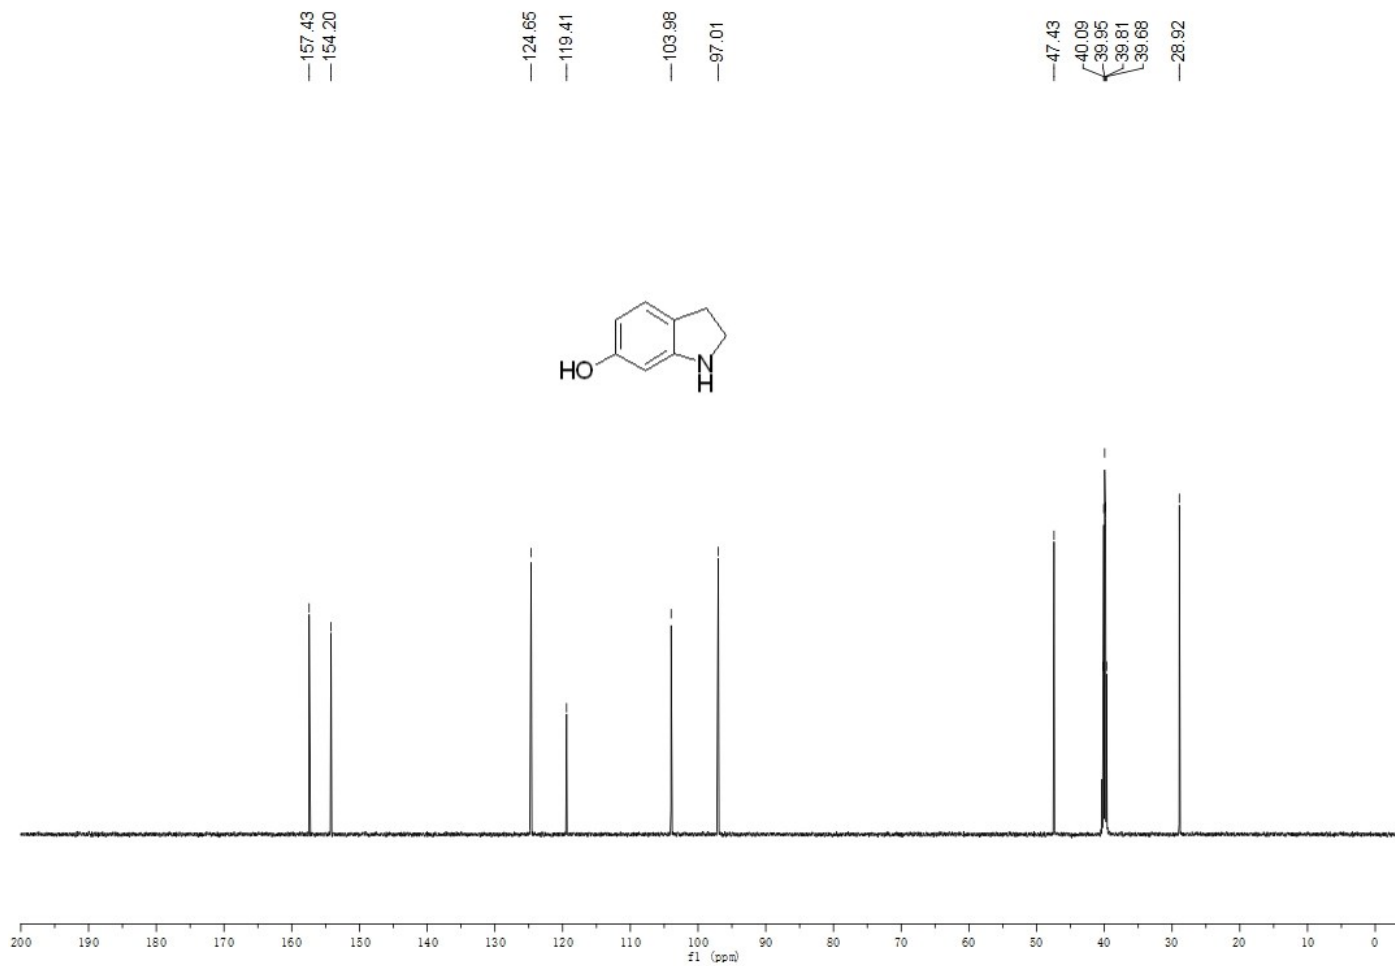

**<sup>1</sup>H-NMR of 2k**

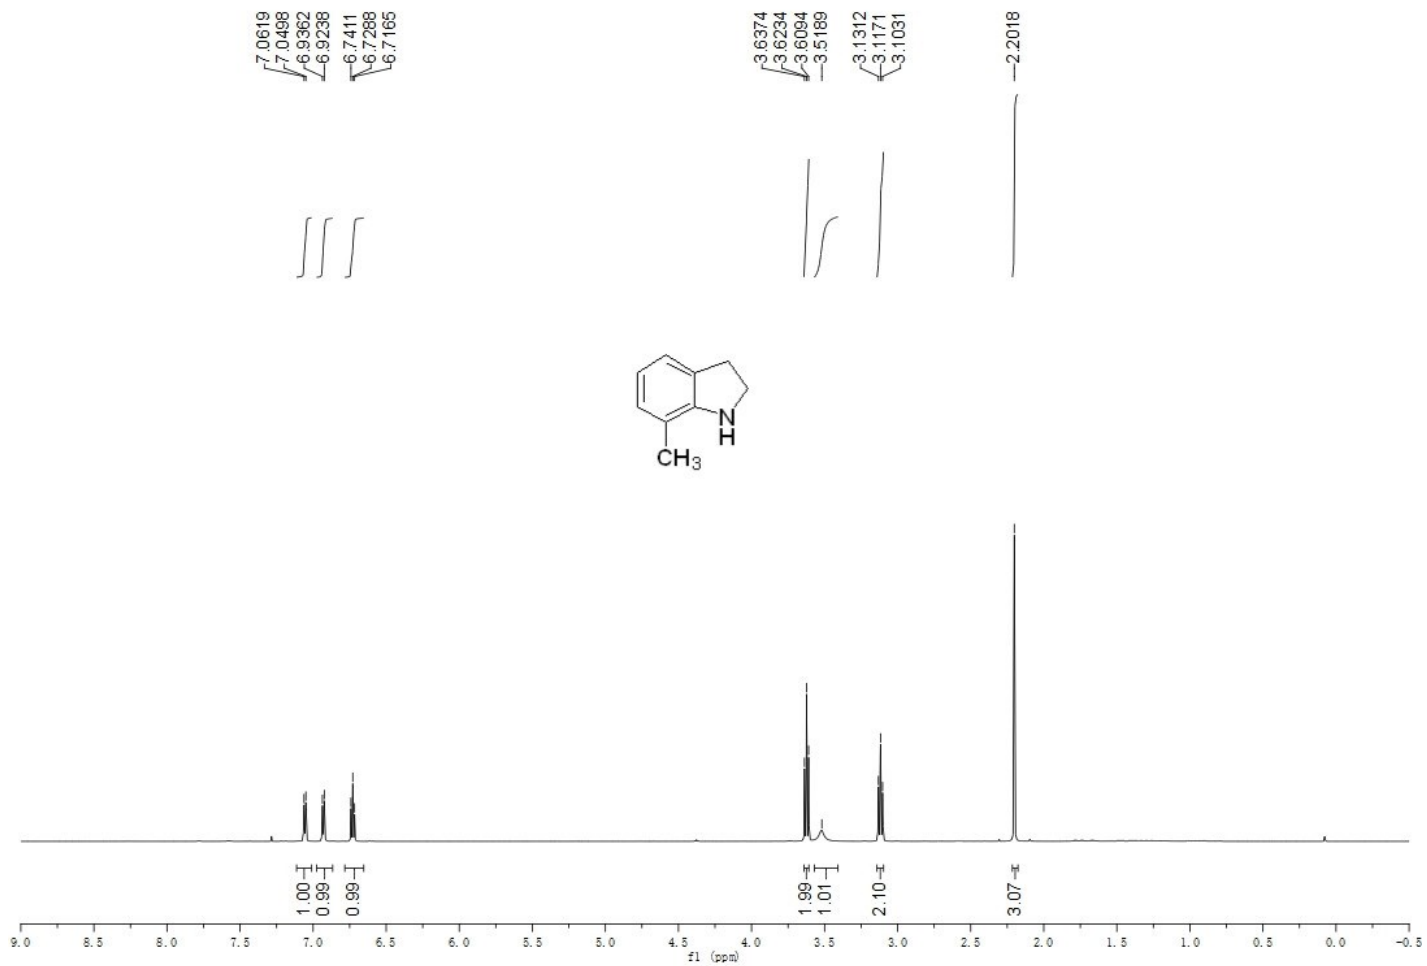

<sup>13</sup>C-NMR of 2k

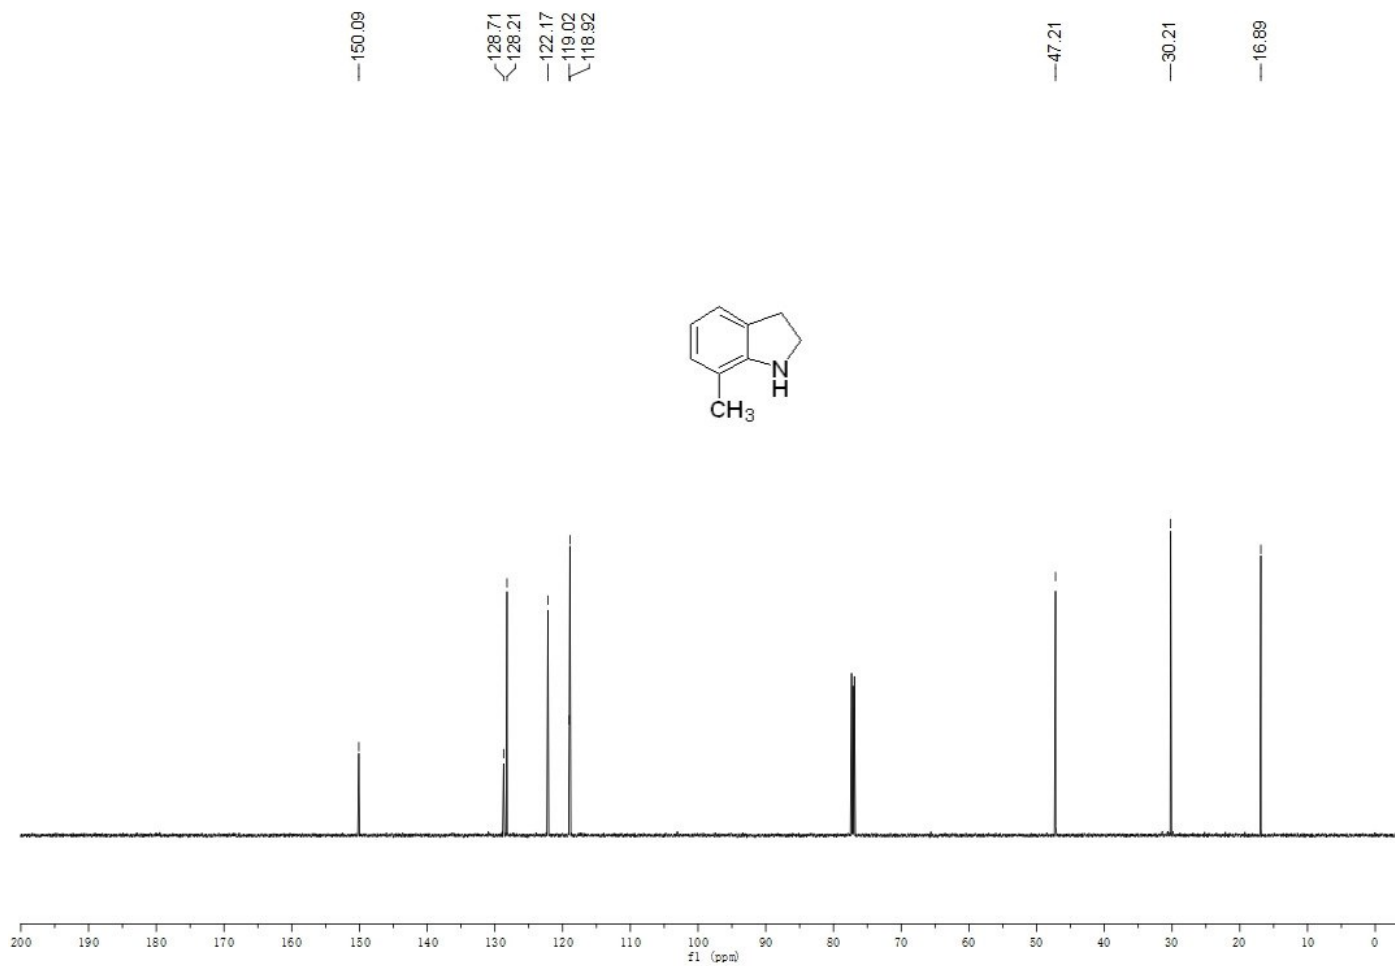

Supplement: d0ob02080j1.pdf [file d0ob02080j1.pdf]
